# Supplementary material
Source: publisher figshare collection journal article supplement (https://frontiersin.figshare.com/ndownloader/files/23867873)
Supplement: Supplementary file 1 [file 23867873]

## ***Supplementary Material***

# 1 SUPPLEMENTARY TABLES AND FIGURES

## 1.1 Lotka-Volterra model (M1)

| Time point (min) | $x_1$   | $x_2$  |
|------------------|---------|--------|
| 1.1              | 1.8823  | 0.5214 |
| 2.4              | 1.5510  | 1.2471 |
| 3.9              | 0.4007  | 0.9858 |
| 5.6              | 0.0454  | 0.2924 |
| 7.5              | 1.8881  | 0.6133 |
| 9.6              | 0.1839  | 1.3163 |
| 11.9             | -0.1940 | 0.8171 |
| 14.4             | 1.6015  | 1.7212 |

**Table S1.** Model M1: *in silico* noisy dataset used for calibration.

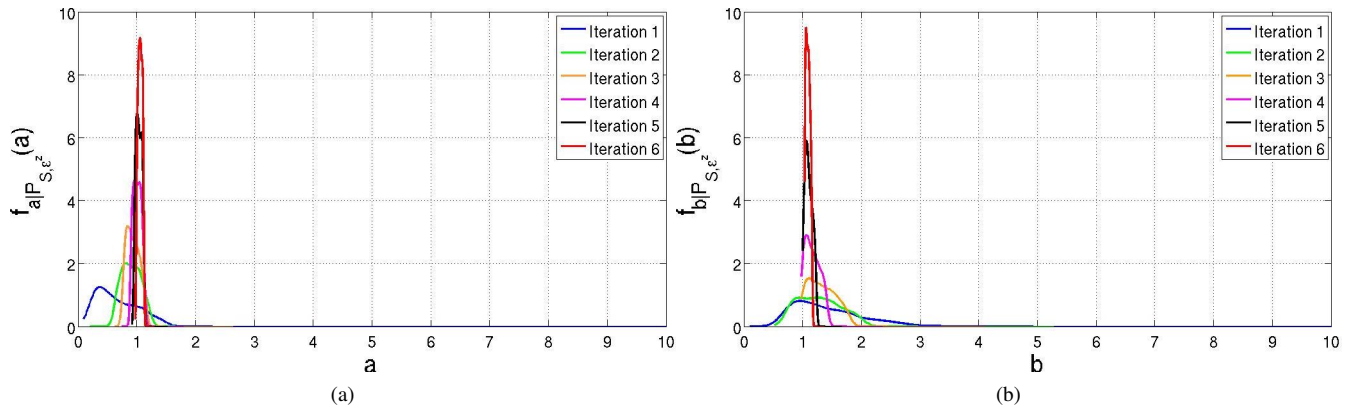

**Figure S1:** Model M1-CRC: S1a, S1b Evolution of the conditional pdfs of parameter  $a$  and  $b$  respectively, in all iterations.

| Iteration (z) | Mean                     |                          | Variance                 |                          |
|---------------|--------------------------|--------------------------|--------------------------|--------------------------|
|               | $f_{D_{x_1}}(d_{x_1,p})$ | $f_{D_{x_2}}(d_{x_2,p})$ | $f_{D_{x_1}}(d_{x_1,p})$ | $f_{D_{x_2}}(d_{x_2,p})$ |
| 1             | $2.4610 * 10^{42}$       | 16.8570                  | $1.3097 * 10^{84}$       | 295.8022                 |
| 2             | 7.0325                   | 6.2825                   | 2.3915                   | 8.4197                   |
| 3             | 6.8387                   | 9.1485                   | 3.3102                   | 27.3043                  |
| 4             | 5.6736                   | 5.3518                   | 2.8713                   | 6.1758                   |
| 5             | 4.6699                   | 4.3444                   | 1.5612                   | 2.0294                   |
| 6             | 3.6127                   | 3.3814                   | 0.3309                   | 0.5885                   |

**Table S2.** Model M1-CRC: summary statistics for the distance functions.

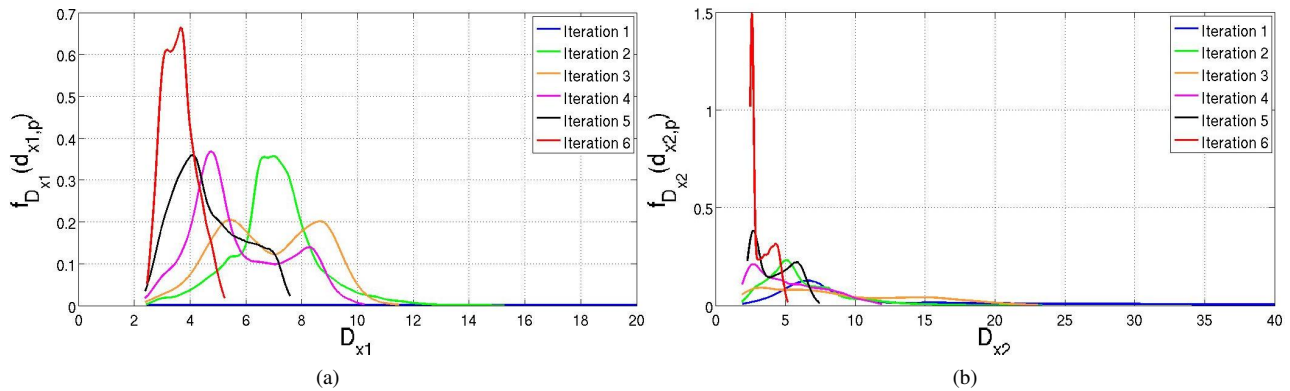

Figure S2: Model M1-CRC: S2a, S2b evolution of the distance functions  $f_{D_{x_1}}(d_{x_1,p})$  and  $f_{D_{x_2}}(d_{x_2,p})$  over the six iterations.

| Iteration (z) | Mean                        |                             | Variance                    |                             |
|---------------|-----------------------------|-----------------------------|-----------------------------|-----------------------------|
|               | $f_{a P_{S,\epsilon z}}(a)$ | $f_{b P_{S,\epsilon z}}(b)$ | $f_{a P_{S,\epsilon z}}(a)$ | $f_{b P_{S,\epsilon z}}(b)$ |
| 1             | 0.6740                      | 1.4020                      | 8.1871                      | 8.1881                      |
| 2             | 0.9071                      | 1.2816                      | 0.2773                      | 1.8854                      |
| 3             | 0.9376                      | 1.3430                      | 0.3364                      | 0.8124                      |
| 4             | 1.0097                      | 1.1821                      | 0.0913                      | 0.1576                      |
| 5             | 1.0360                      | 1.1099                      | 0.0305                      | 0.0363                      |
| 6             | 1.0583                      | 1.0946                      | 0.0081                      | 0.0091                      |

Table S3. Model M1-CRC: summary statistics of  $f_{a|P_{S,\epsilon z}}(a)$  and  $f_{b|P_{S,\epsilon z}}(b)$ .

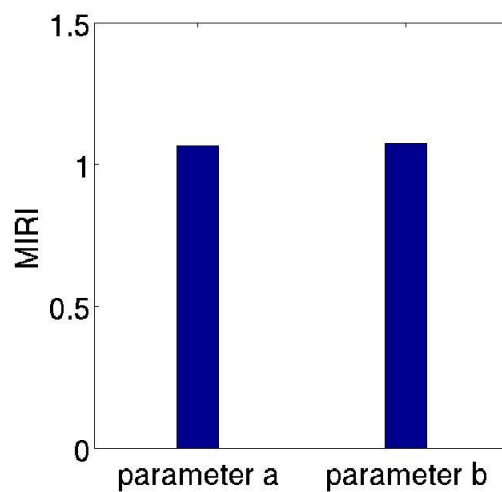

Figure S3: Model M1-CRC: values of the MIRI for parameter  $a$  and  $b$ , obtained through robustness analysis.

| Parameter | $\hat{p}$ | $\sigma^-$ | $\sigma^+$ |
|-----------|-----------|------------|------------|
| $a$       | +1.066    | +0.937     | +1.162     |
| $b$       | +1.046    | +0.872     | +1.340     |

Table S4. Model M1-PL: results of the Profile Likelihood.  $\hat{p}$  is the parameter value estimated by *lsqnonlin*,  $\sigma^-$  and  $\sigma^+$  are the 95% point-wise confidence intervals.

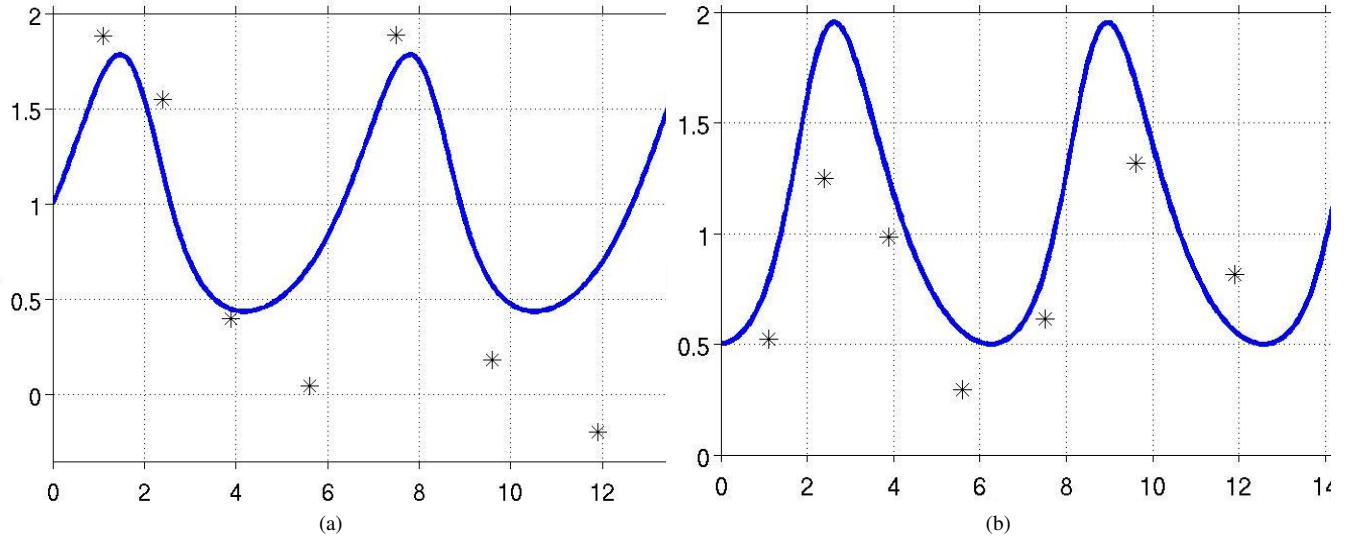

Figure S4: Model M1-PL: time behavior of output variables  $x_1$  (S4a) and  $x_2$  (S4b) using best fit parameters estimated by *lsqnonlin* in D2D (see Table S4). Asterisks represent the experimental dataset.

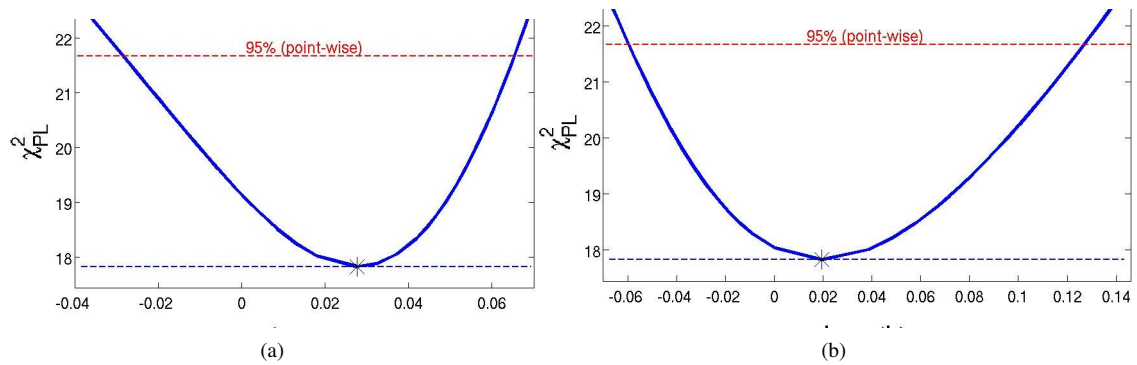

Figure S5: Model M1-PL: Profile Likelihood (denoted by  $\chi^2_{PL}$ ) of parameter  $a$  (S5a) and parameter  $b$  (S5b). The solid lines indicate the PL; the broken lines indicate the threshold to assess confidence intervals; the asterisks indicate the optimal parameter values.

| Iteration | Number of generated particles | Tolerance |
|-----------|-------------------------------|-----------|
| 1         | 26228                         | 30        |
| 2         | 36667                         | 16        |
| 3         | 46989                         | 6         |
| 4         | 49271                         | 5         |
| 5         | 52194                         | 4.3       |

Table S5. Model M1-ABC SMC: results of ABC-SMC algorithm Toni et al. (2009).



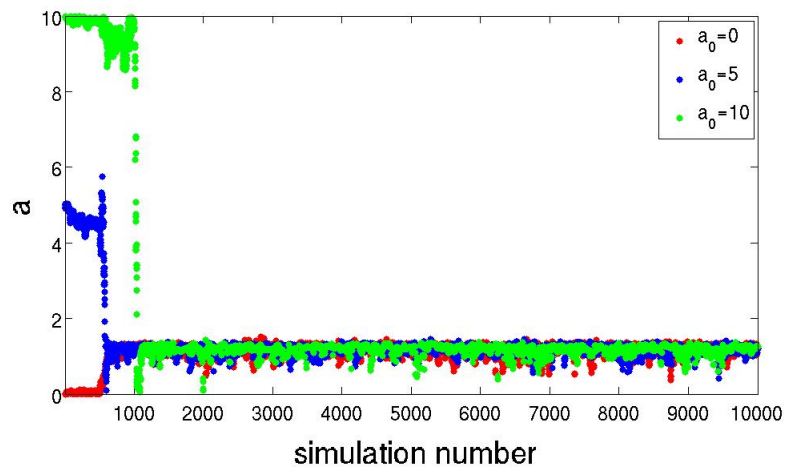

(a)

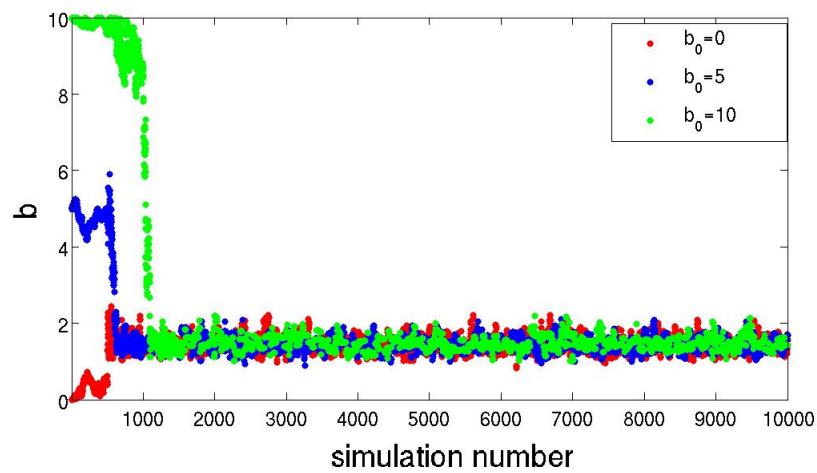

(b)

Figure S6: Model M1-DRAM: DRAM chain for parameter  $a$  (S6a) and  $b$  (S6b) when the initial error variance is set to 0.1 and the corresponding prior weight is set to 3. The red, blue and green chains correspond to initial parameter values equal to 0, 5 and 10, respectively. The x-axis represents the length of the DRAM chain.

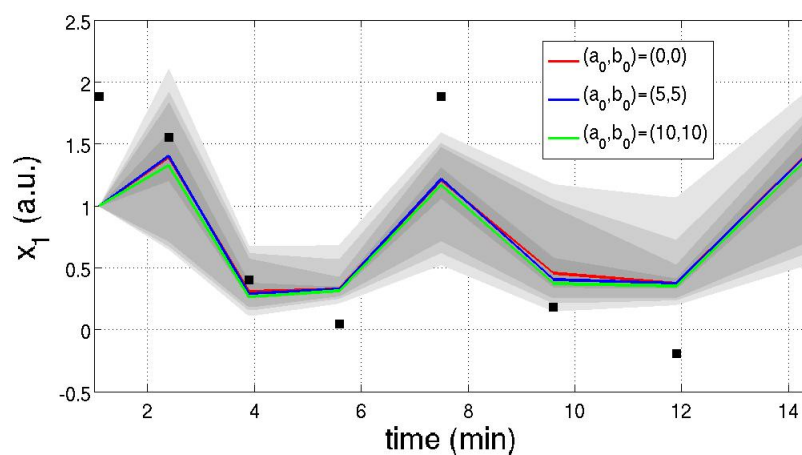

(a)

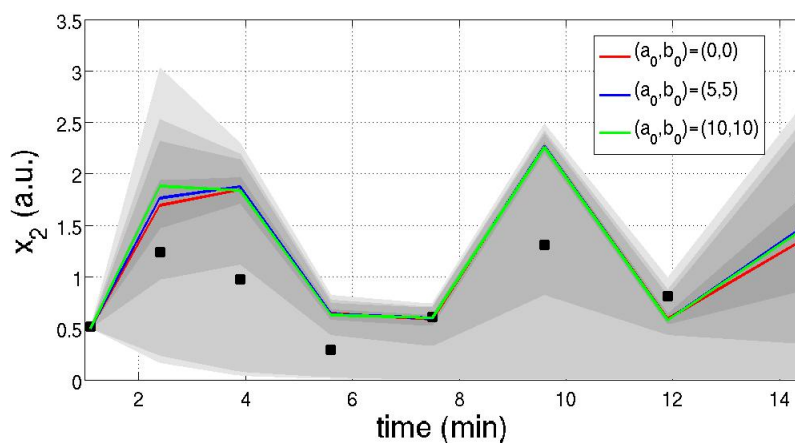

(b)

Figure S7: Model M1-DRAM: the red, blue and green line represents the time behavior of  $x_1$  (S7a) and  $x_2$  (S7b) when parameters are equal to the mean values of the chains returned by DRAM when initial parameter values are both equal to 0, 5 and 10, respectively. Black squares are the experimental data. The gray regions represent the 50%, 90%, 95%, and 99% predictive probability limits due parameter uncertainty.

## 1.2 EpoR System model (M2)

$$\begin{aligned}
 \dot{E} &= -k_1 \cdot E \cdot L \\
 \dot{E}^* &= k_1 \cdot E \cdot L - k_2 \cdot E^* \\
 \dot{E}^{**} &= k_2 \cdot E^* \\
 \dot{S} &= -k_3 \cdot E^{**} \cdot S \\
 \dot{P} &= k_3 \cdot E^{**} \cdot S
 \end{aligned} \tag{S1}$$

$$\begin{aligned}
 E(0) &= init_E \\
 E^*(0) &= 0 \\
 E^{**}(0) &= 0 \\
 S(0) &= init_S \\
 P(0) &= 0
 \end{aligned} \tag{S2}$$

$$\begin{aligned}
 y_1(t_i) &= scale_E \cdot E(t_i) \\
 y_2(t_i) &= scale_S \cdot S(t_i)
 \end{aligned} \tag{S3}$$

| Time (min) | Noiseless dataset |                        | Noisy dataset |       |
|------------|-------------------|------------------------|---------------|-------|
|            | $y_1$             | $y_2$                  | $y_1$         | $y_2$ |
| 0          | 40                | 10                     | 39.24         | 10.24 |
| 3.33       | -                 | 9.4909                 | -             | 10.61 |
| 6.66       | -                 | 6.9968                 | -             | 7.23  |
| 10         | 14.7152           | 3.5448                 | 21.89         | 5.47  |
| 13.33      | -                 | 1.2052                 | -             | 1.43  |
| 16.66      | -                 | 0.2768                 | -             | 0.53  |
| 20         | 5.4134            | 0.0446                 | 3.08          | 1.08  |
| 23.33      | -                 | 0.0054                 | -             | 0.38  |
| 26.66      | -                 | $5.0042 \cdot 10^{-4}$ | -             | 0.11  |
| 30         | 1.9915            | $3.8284 \cdot 10^{-5}$ | 0.12          | 0.08  |
| 40         | 0.732             | -                      | 1.37          | -     |

**Table S6.** Model M2: noiseless and noisy datasets used for parameter estimation and robustness analysis Raue et al. (2011).

| Iteration | $f_{D_{y_1}}(d_{y_1,p})$ |          | $f_{D_{y_2}}(d_{y_2,p})$ |          |
|-----------|--------------------------|----------|--------------------------|----------|
|           | Mean value               | Variance | Mean value               | Variance |
| 1         | 217.4148                 | 919.7    | 465.0677                 | 2692.3   |
| 2         | 220.0488                 | 834.4704 | 108.8659                 | 372.1710 |
| 3         | 127.0054                 | 325.2496 | 84.1557                  | 209.9309 |
| 4         | 93.1872                  | 159.6009 | 48.5669                  | 61.8872  |
| 5         | 67.1666                  | 63.0651  | 38.2407                  | 22.3253  |
| 6         | 48.9377                  | 21.3781  | 32.6934                  | 5.5355   |
| 7         | 27.7286                  | 9.1382   | 26.1496                  | 2.9610   |
| 8         | 18.6834                  | 4.8059   | 13.6144                  | 2.9206   |
| 9         | 15.2435                  | 2.0665   | 7.3401                   | 1.5109   |

**Table S7.** Model M2-CRC: summary statistics for  $f_{D_{y_1}}(d_{y_1,p})$  and  $f_{D_{y_2}}(d_{y_2,p})$  over the nine iterations. Values are averaged over the 10 independent realizations.

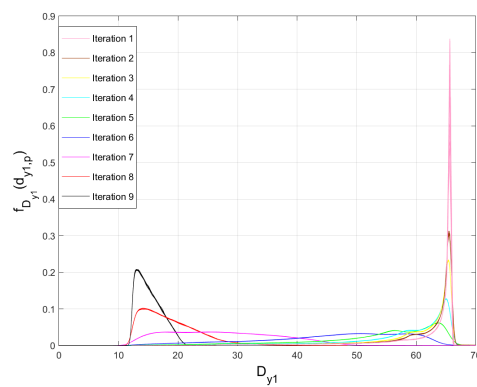

**Figure S8:** Model M2-CRC: pdf of  $y_1$  distance function.

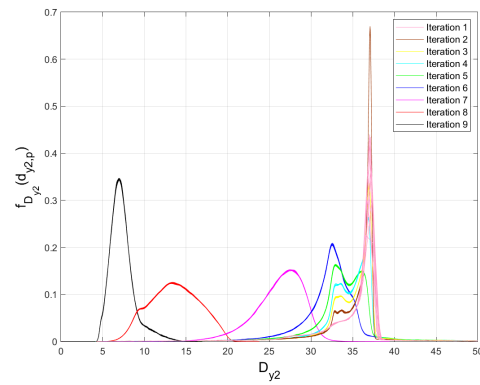

Figure S9: Model M2-CRC: pdf of  $y_2$  distance function.

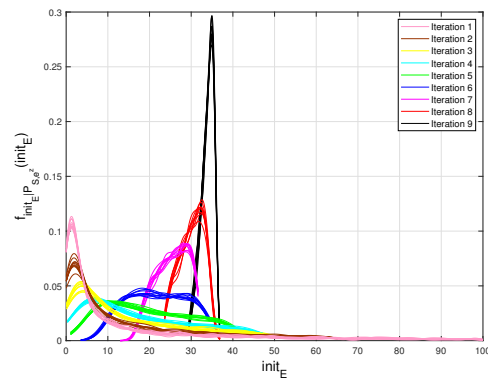

Figure S10: Model M2-CRC: conditional pdfs of the  $init_E$  parameter.

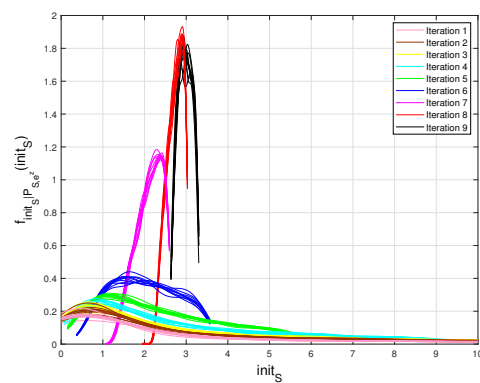

Figure S11: Model M2-CRC: conditional pdfs of the  $init_S$  parameter.

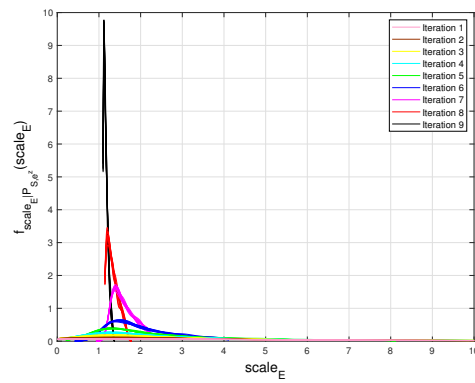

Figure S12: Model M2-CRC: conditional pdfs of the  $scale_E$  parameter.

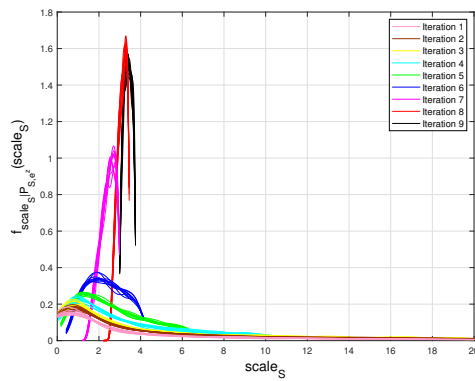

Figure S13: Model M2-CRC: conditional pdfs of the  $init_S$  parameter.

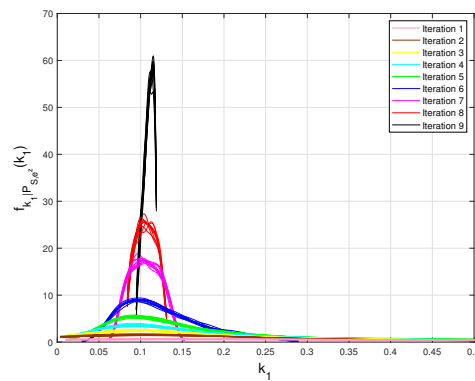

Figure S14: Model M2-CRC: conditional pdfs of the  $k_1$  parameter.

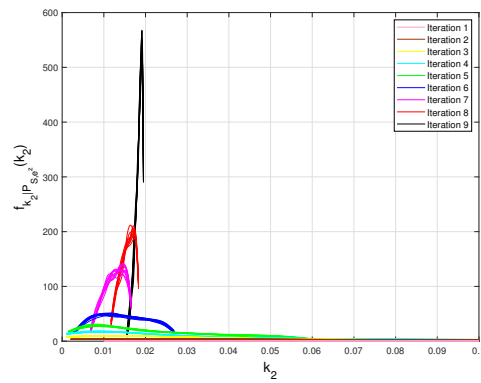

Figure S15: Model M2-CRC: conditional pdfs of the  $k_2$  parameter.

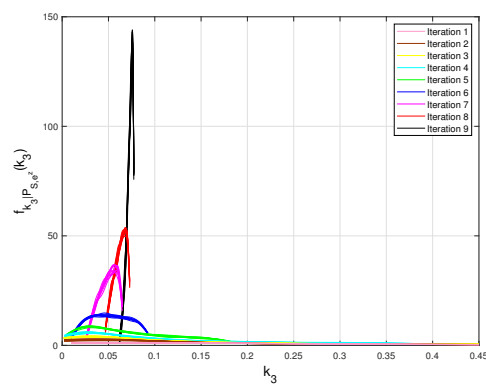

Figure S16: Model M2-CRC: conditional pdfs of the  $k_3$  parameter.

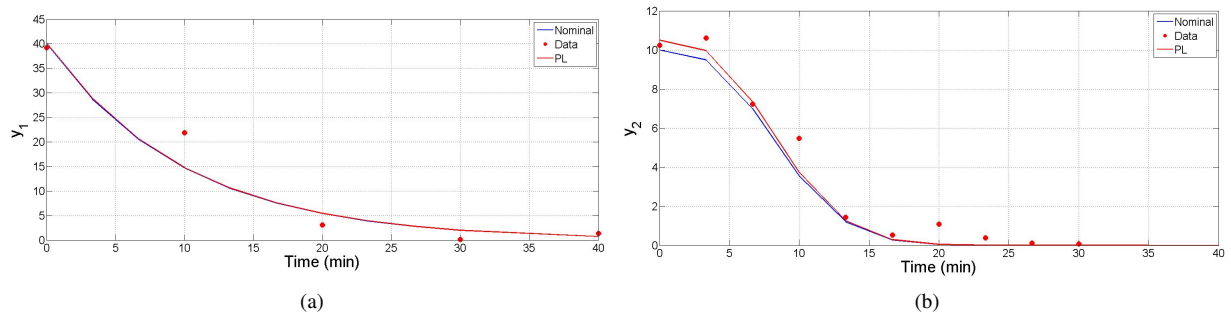

Figure S17: Model M2-PL: S17a S17b show the temporal behavior of  $y_1$  and  $y_2$  returned by PL approach.

| Parameter | Iteration | Mean value | Variance | Mode   |
|-----------|-----------|------------|----------|--------|
| $k_1$     | 1         | 11.6207    | 19.9535  | 0.1676 |
|           | 2         | 1.4223     | 1.9153   | 0.1057 |
|           | 3         | 0.5564     | 0.6338   | 0.0955 |
|           | 4         | 0.3016     | 0.2861   | 0.0928 |
|           | 5         | 0.1828     | 0.1280   | 0.0925 |
|           | 6         | 0.1254     | 0.0490   | 0.0976 |
|           | 7         | 0.1058     | 0.0183   | 0.1024 |
|           | 8         | 0.1096     | 0.0122   | 0.1042 |
|           | 9         | 0.1092     | 0.0062   | 0.1143 |
| $k_2$     | 1         | 11.3579    | 18.8793  | 0.1031 |
|           | 2         | 0.7662     | 1.1162   | 0.0248 |
|           | 3         | 0.1360     | 0.1512   | 0.0128 |
|           | 4         | 0.0480     | 0.0425   | 0.0095 |
|           | 5         | 0.0237     | 0.0161   | 0.0086 |
|           | 6         | 0.0145     | 0.0065   | 0.0106 |
|           | 7         | 0.0124     | 0.0025   | 0.0143 |
|           | 8         | 0.0156     | 0.0017   | 0.0171 |
|           | 9         | 0.0183     | 0.0009   | 0.0191 |
| $k_3$     | 1         | 8.7008     | 17.8986  | 0.1031 |
|           | 2         | 0.8074     | 1.1006   | 0.0422 |
|           | 3         | 0.2615     | 0.2676   | 0.0327 |
|           | 4         | 0.1316     | 0.1108   | 0.0292 |
|           | 5         | 0.0758     | 0.0497   | 0.0296 |
|           | 6         | 0.0514     | 0.0223   | 0.0415 |
|           | 7         | 0.0491     | 0.0098   | 0.0569 |
|           | 8         | 0.0623     | 0.0068   | 0.0678 |
|           | 9         | 0.0728     | 0.0033   | 0.0758 |

Table S8. Model M2-CRC: summary statistics of the three kinetic parameters.

| Parameter | Iteration | Mean value | Variance | Mode    |
|-----------|-----------|------------|----------|---------|
| $init_E$  | 1         | 16.6944    | 22.0296  | 1.3032  |
|           | 2         | 15.6962    | 16.4395  | 1.9840  |
|           | 3         | 15.8885    | 13.4175  | 3.8127  |
|           | 4         | 18.3333    | 12.9594  | 6.6465  |
|           | 5         | 19.8313    | 10.6221  | 10.9966 |
|           | 6         | 21.4556    | 7.0448   | 20.2614 |
|           | 7         | 25.1709    | 3.8984   | 28.8037 |
|           | 8         | 30.1755    | 2.9611   | 32.2857 |
|           | 9         | 33.9041    | 1.5291   | 34.9329 |
| $init_S$  | 1         | 15.6737    | 22.0031  | 0.5592  |
|           | 2         | 6.1501     | 6.8975   | 0.7217  |
|           | 3         | 4.5241     | 4.5694   | 0.7536  |
|           | 4         | 3.0397     | 2.4375   | 0.9278  |
|           | 5         | 2.3863     | 1.4694   | 1.1437  |
|           | 6         | 1.9944     | 0.8117   | 1.6620  |
|           | 7         | 2.0976     | 0.3166   | 2.3654  |
|           | 8         | 2.7230     | 0.1935   | 2.8951  |
|           | 9         | 2.9790     | 0.1756   | 2.9554  |

Table S9. Model M2-CRC: summary statistics of the parameters of the two initial conditions.



| Parameter | Iteration | Mean value | Variance | Mode   |
|-----------|-----------|------------|----------|--------|
| $s_1$     | 1         | 19.6923    | 23.2733  | 1.7029 |
|           | 2         | 14.2438    | 18.3015  | 1.4727 |
|           | 3         | 6.9718     | 7.9647   | 1.3845 |
|           | 4         | 4.0516     | 3.8055   | 1.3002 |
|           | 5         | 2.6284     | 1.7600   | 1.3185 |
|           | 6         | 2.0039     | 0.7726   | 1.4515 |
|           | 7         | 1.5910     | 0.2682   | 1.3950 |
|           | 8         | 1.3388     | 0.1368   | 1.2086 |
|           | 9         | 1.1705     | 0.0535   | 1.1224 |
| $s_2$     | 1         | 16.3713    | 22.4893  | 0.6056 |
|           | 2         | 6.7946     | 7.4791   | 0.8120 |
|           | 3         | 5.0803     | 5.1099   | 0.8483 |
|           | 4         | 3.4347     | 2.7596   | 1.0551 |
|           | 5         | 2.7124     | 1.6798   | 1.3281 |
|           | 6         | 2.3114     | 0.9483   | 1.9099 |
|           | 7         | 2.4076     | 0.3647   | 2.6942 |
|           | 8         | 3.0965     | 0.2210   | 3.2922 |
|           | 9         | 3.3867     | 0.2018   | 3.3674 |

**Table S10.** Model M2-CRC: summary statistics of the two scale factor parameters.

| Parameter name | $p^*$ | $\hat{p}$ | $\sigma^-$ | $\sigma^+$ |
|----------------|-------|-----------|------------|------------|
| $k_1$          | 0.1   | 0.087     | 0.04       | 0.2        |
| $k_2$          | 0.1   | 0.019     | -Inf       | +Inf       |
| $k_3$          | 0.1   | 0.37      | 0.015      | +Inf       |
| $init_E$       | 10    | 10.05     | 9.66       | 10.42      |
| $init_S$       | 5     | 4.97      | 4.78       | 5.15       |
| $scale_E$      | 4     | 4.027     | 2.57       | 5.5        |
| $scale_S$      | 2     | 2.1       | 1.59       | 2.79       |

**Table S11.** Model M2-PL: results of parameter estimation and identifiability analysis achieved through the PL approach.  $p^*$  is the nominal parameter value,  $\hat{p}$  is the estimated value,  $\sigma^-$  and  $\sigma^+$  are, respectively, the lower and upper boundary of the confidence interval.

| Population | Threshold | N.particles | Acceptance rate | Time simulation (s) |
|------------|-----------|-------------|-----------------|---------------------|
| 1          | 82        | 389908      | 0.0025          | 41934               |
| 2          | 81        | 104151      | 0.0096          | 11122               |
| 3          | 76.9      | 100485      | 0.0099          | 10894               |
| 4          | 70.3      | 106418      | 0.0093          | 11833               |
| 5          | 62.6      | 117310      | 0.0085          | 14267               |
| 6          | 52.5      | 176936      | 0.0056          | 18106               |
| 7          | 37.5      | 349409      | 0.0028          | 46656               |

**Table S12.** Model M2-ABC SMC: results of ABC-SMC algorithm.

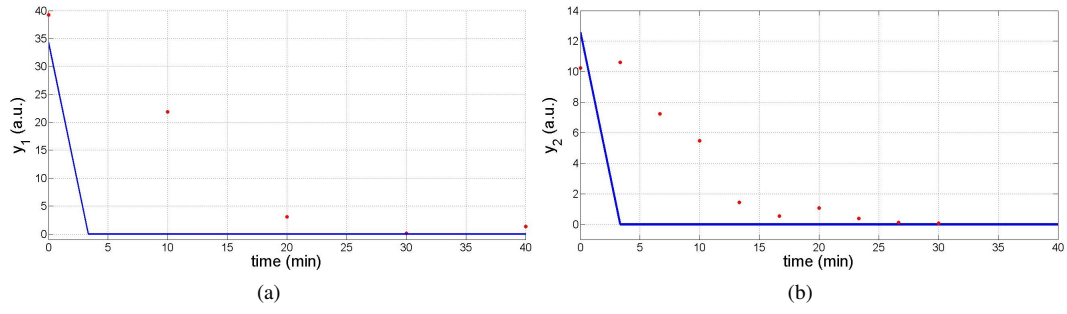

Figure S18: Model M2-ABC SMC: S18a and S18b show the temporal behavior of  $y_1$  and  $y_2$ . The blue lines are the time simulations using the median parameter vector returned by ABC-SMC. Red dots are the *in silico* noisy data.

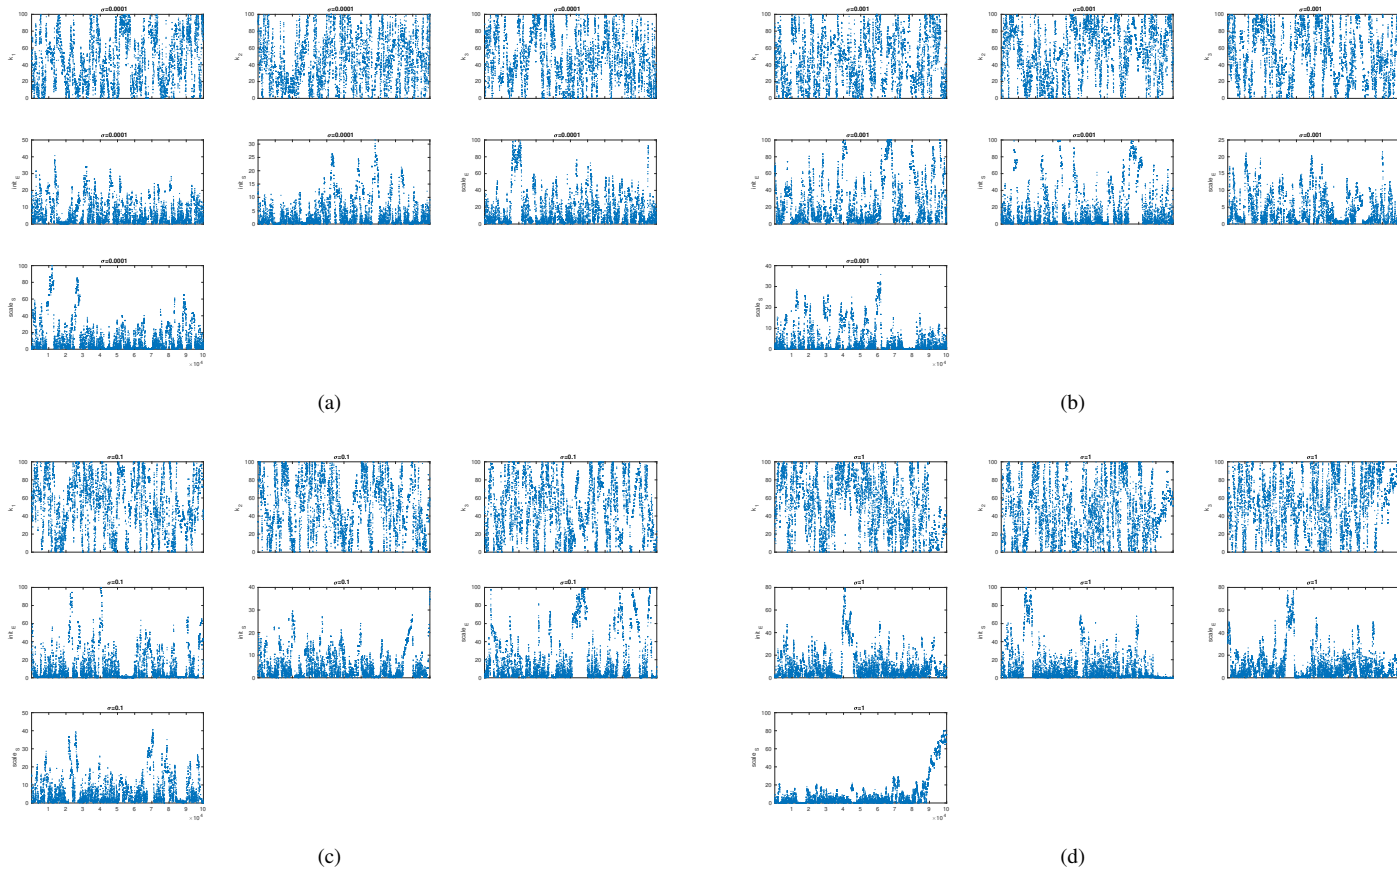

Figure S19: Model M2-DRAM: chains of all the parameters returned by DRAM in the 9th iteration. The x-axis represents the length of the chain. The vector of the initial conditions is  $[0.5, 0.5, 0.5, 8, 7, 5, 3]$ . The initial error variance  $\sigma$  is set equal to 0.001 (S19a), 0.01 (S19b), 0.1 (S19c) and 1 (S19d).

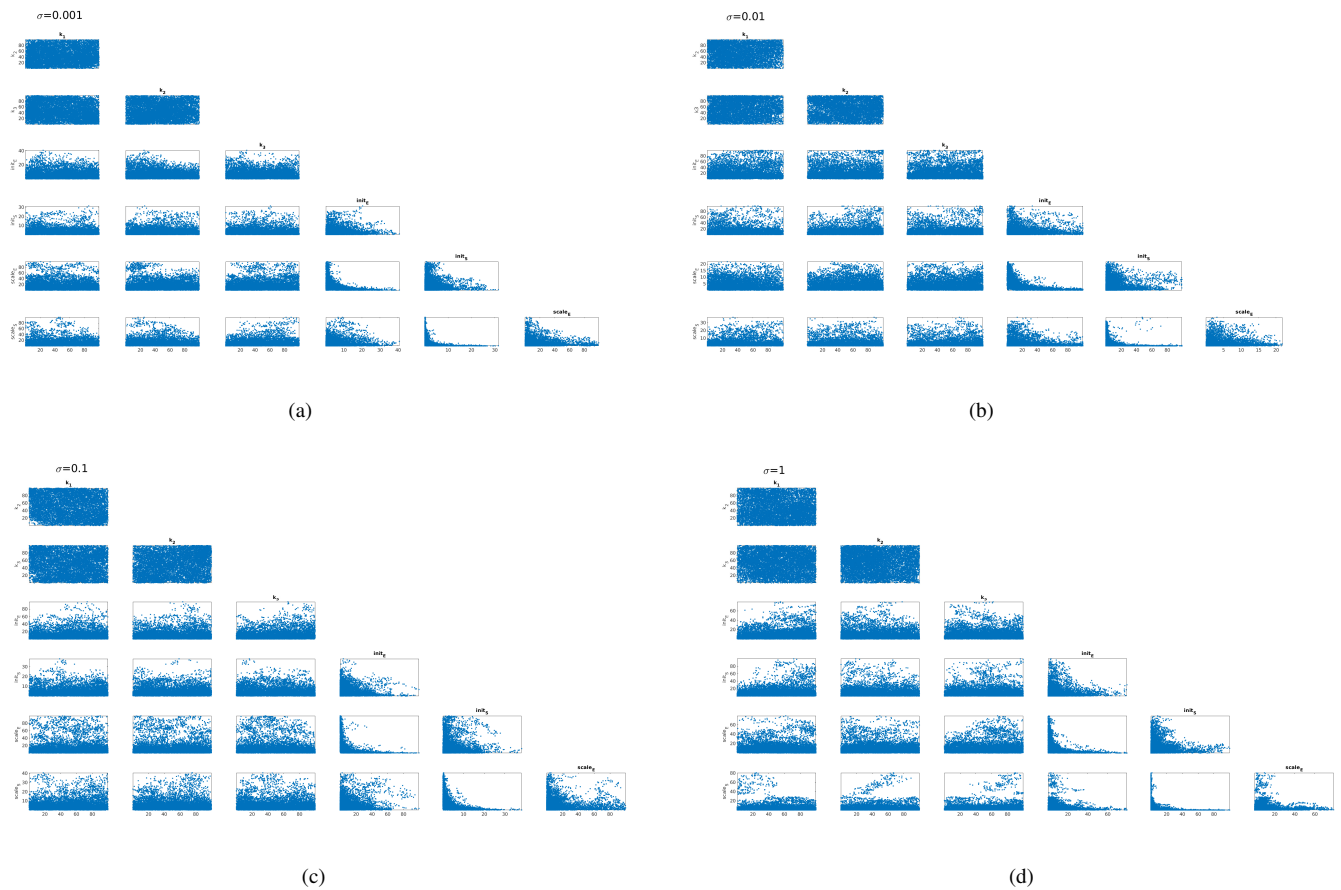

Figure S20: Model M2-DRAM: pairplot of the chains of all the parameters in the 9th iteration. The x-axis and y-axis represent the different model parameters. The vector of the initial conditions is  $[0.5, 0.5, 0.5, 8, 7, 5, 3]$ . The initial error variance  $\sigma$  is set equal to 0.001 (S20a), 0.01 (S20b), 0.1 (S20c) and 1 (S20d).

| Parameter name | $\sigma = 0.001$ | $\sigma = 0.01$ | $\sigma = 0.1$ | $\sigma = 1$ |
|----------------|------------------|-----------------|----------------|--------------|
| $k_1$          | 44.5             | 45              | 52.82          | 52.07        |
| $k_2$          | 44.27            | 56.01           | 51.04          | 44.85        |
| $k_3$          | 48.33            | 51.6            | 49.25          | 54.70        |
| $init_E$       | 7.54             | 27.2            | 13.55          | 10.81        |
| $init_S$       | 4.54             | 21.06           | 5.75           | 13.11        |
| $scale_E$      | 18.42            | 4.52            | 24.23          | 11.64        |
| $scale_S$      | 14.51            | 4.93            | 6.99           | 10.13        |

Table S13. Model M2-DRAM: mean values of parameter chains returned by DRAM in the 9th iteration with different values of the error variance  $\sigma$ .

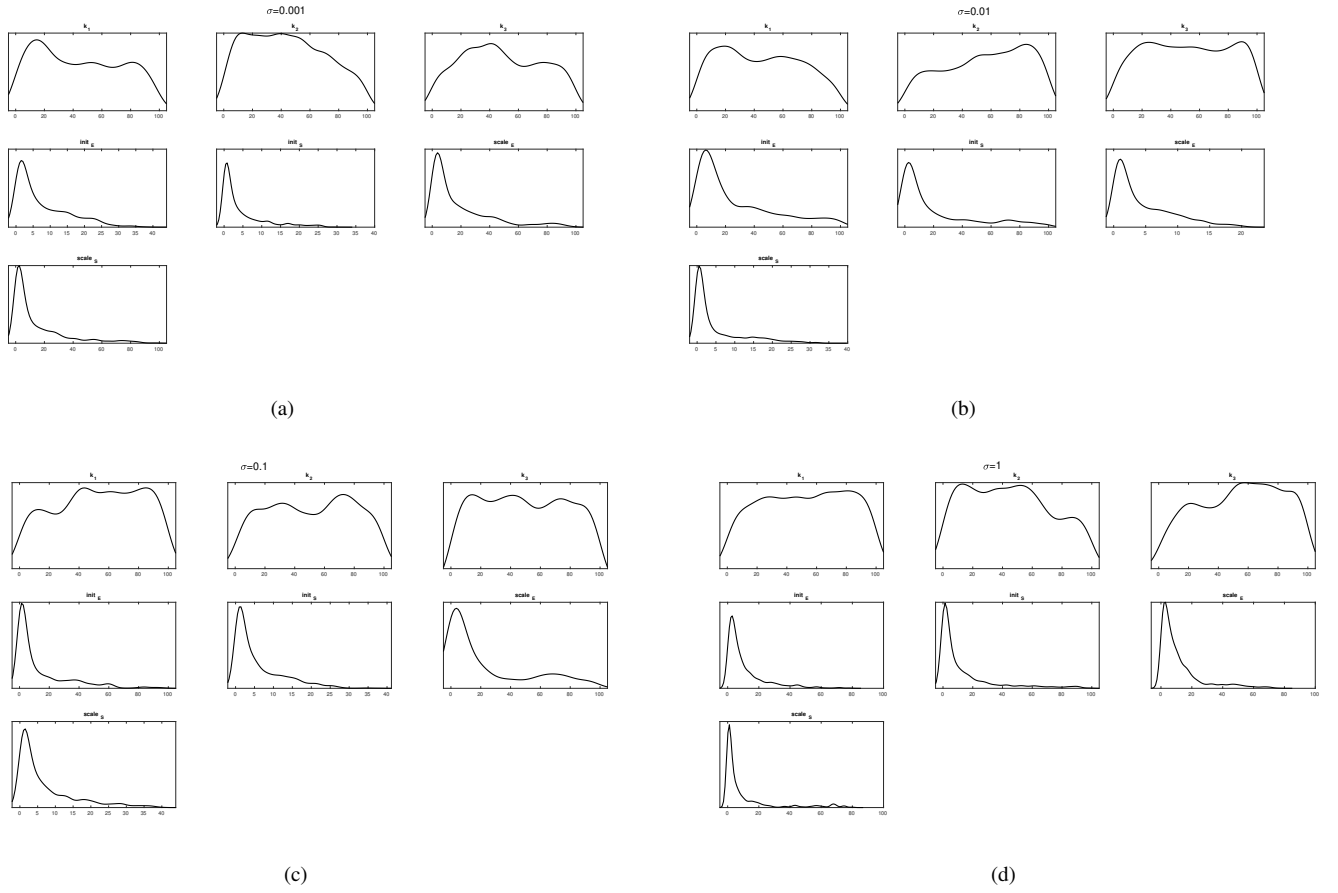

Figure S21: Model M2-DRAM: pdfs of all the parameters in the 9th iteration. The vector of the initial conditions is  $[0.5, 0.5, 0.5, 8, 7, 5, 3]$ . The initial error variance  $\sigma$  is set equal to 0.001 (S21a), 0.01(S21b), 0.1(S21c) and 1(S21d).

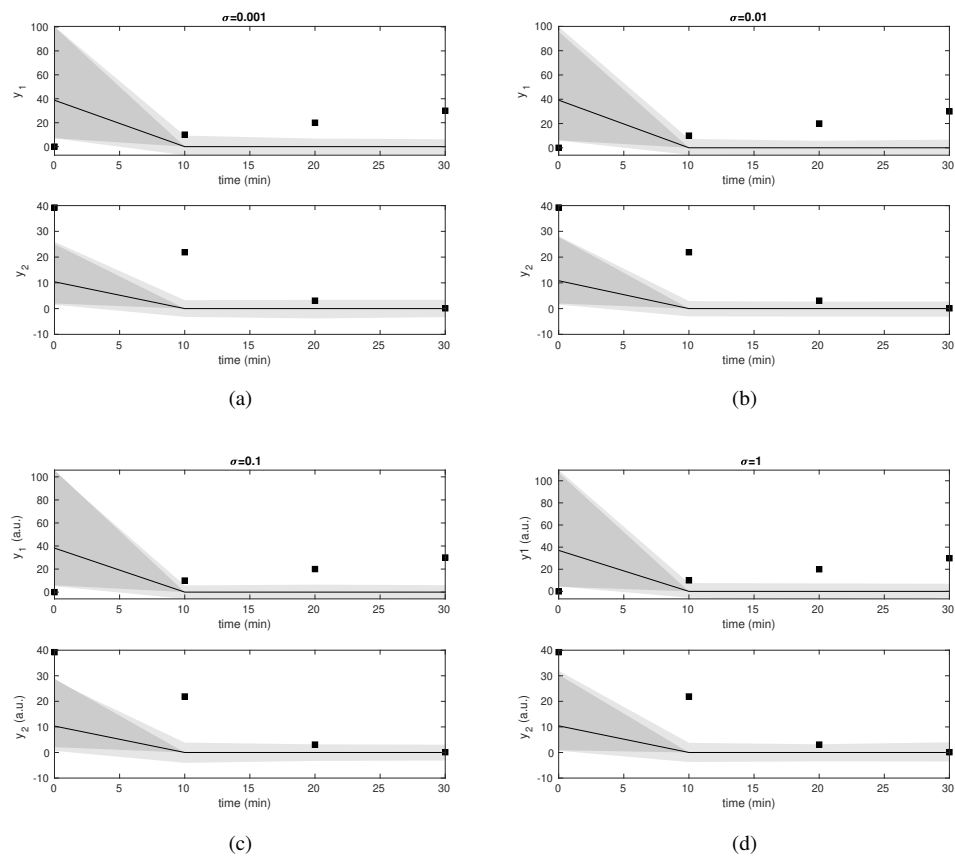

Figure S22: Model M2-DRAM: time behavior of the output variables when parameters are set equal to the mean of corresponding chains (see Table S13) returned by DRAM in the 9th iteration. The black squares are the experimental data used to calibrate the model. The vector of the initial conditions is  $[0.5, 0.5, 0.5, 8, 7, 5, 3]$ . The initial error variance  $\sigma$  is set equal to 0.001 (S22a), 0.01 (S22b), 0.1 (S22c) and 1 (S22d).

### 1.3 Multiple Myeloma model (M3)

|          |              | Time points (min) |       |       |       |       |       |
|----------|--------------|-------------------|-------|-------|-------|-------|-------|
|          |              | 0                 | 5     | 10    | 30    | 60    | 90    |
| Proteins | Shc Y317     | 1.000             | 1.029 | 1.139 | 1.113 | 1.124 | 1.108 |
|          | Pras40 T246  | 1.000             | 0.889 | 0.779 | 0.813 | 0.916 | 0.906 |
|          | PI3K p85     | 1.000             | 0.844 | 0.773 | 0.805 | 0.800 | 0.814 |
|          | p38 T180-182 | 1.000             | 1.065 | 0.930 | 1.123 | 1.010 | 0.834 |
|          | PDK1 S241    | 1.000             | 0.826 | 0.860 | 0.807 | 0.894 | 0.834 |
|          | AKT S473     | 1.000             | 1.111 | 1.502 | 1.408 | 1.254 | 1.489 |
|          | mTOR S2248   | 1.000             | 1.082 | 1.383 | 1.440 | 1.219 | 1.440 |
|          | Rafc S388    | 1.000             | 1.087 | 0.960 | 0.954 | 0.897 | 0.858 |
|          | MEK1 S217    | 1.000             | 0.908 | 0.847 | 0.777 | 0.822 | 0.790 |
|          | MAPK T202    | 1.000             | 0.959 | 1.069 | 0.991 | 1.036 | 0.992 |
|          | p70S6K T389  | 1.000             | 1.080 | 1.191 | 1.124 | 1.332 | 1.033 |
|          | CJUN S73     | 1.000             | 1.000 | 0.994 | 1.134 | 1.165 | 1.559 |
|          | Bclxl        | 1.000             | 1.087 | 1.013 | 0.992 | 1.089 | 1.058 |
|          | BAX          | 1.000             | 1.075 | 0.993 | 0.984 | 1.050 | 1.007 |
|          | NFKB S65     | 1.000             | 1.201 | 1.008 | 1.281 | 1.023 | 0.706 |
|          | PARP-cleaved | 1.000             | 0.983 | 1.039 | 0.908 | 0.912 | 0.980 |

**Table S14.** Model M3: dataset of RPPA values used for calibration Peng et al. (2014).

The equations of Model M3 are reported below:

$$\dot{GFR} = -k_{GFR} * GFR + k_{pGFR} * pGFR$$

$$p\dot{GFR} = k_{GFR} * GFR - k_{pGFR} * pGFR$$

$$\dot{Shc} = -k_{Shc.pGFR} * Shc * pGFR + k_{pShc} * pShc$$

$$p\dot{Shc} = k_{Shc.pGFR} * Shc * pGFR - k_{pShc} * pShc$$

$$\dot{RasGDP} = -k_{RasGDP.pShc} * RasGDP * pShc + k_{RasGTP.pERK12} * RasGTP * pERK12$$

$$Ras\dot{GTP} = k_{RasGDP.pShc} * RasGDP * pShc - k_{RasGTP.pERK12} * RasGTP * pERK12$$

$$\dot{IRS1} = -k_{IRS1.pGFR} * IRS1 * pGFR + k_{pIRS1.pERK12} * pIRS1 * pERK12 +$$

$$+ k_{pIRS1.pAKT} * pIRS1 * pAKT$$

$$p\dot{IRS1} = k_{IRS1.pGFR} * IRS1 * pGFR - k_{pIRS1.pERK12} * pIRS1 * pERK12 -$$

$$- k_{pIRS1.pAKT} * pIRS1 * pAKT$$

$$\dot{PI3K} = -k_{PI3K.pIRS1} * PI3K * pIRS1 + k_{pPI3K} * pPI3K$$

$$p\dot{PI3K} = k_{PI3K.pIRS1} * PI3K * pIRS1 - k_{pPI3K} * pPI3K$$

$$\dot{MKK47} = -k_{MKK47.RasGTP} * MKK47 * RasGTP + k_{MKK47.pPI3K} * MKK47 * pPI3K +$$

$$+ k_{pMKK47} * pMKK47$$

$$p\dot{MKK47} = k_{MKK47.RasGTP} * MKK47 * RasGTP - k_{MKK47.pPI3K} * MKK47 * pPI3K -$$

$$- k_{pMKK47} * pMKK47$$

$$\dot{p38} = -k_{p38.pMKK47} * p38 * pMKK47 + k_{pp38} * pp38$$

$$pp\dot{38} = k_{p38.pMKK47} * p38 * pMKK47 - k_{pp38} * pp38$$

$$\dot{PDK1} = -k_{PDK1.pPI3K} * PDK1 * pPI3K + k_{pPDK1} * pPDK1$$

$$p\dot{PDK1} = k_{PDK1.pPI3K} * PDK1 * pPI3K - k_{pPDK1} * pPDK1$$

$$\dot{AKT} = -k_{AKT.pPDK1} * AKT * pPDK1 - k_{AKT.pPI3K} * AKT * pPI3K -$$

$$- k_{AKT.RasGTP} * AKT * RasGTP + k_{pAKT} * pAKT$$

$$\begin{aligned}
p\dot{A}KT &= k_{AKT\_pPDK1} * AKT * pPDK1 + k_{AKT\_pPI3K} * AKT * pPI3K + \\
&+ k_{AKT\_RasGTP} * AKT * RasGTP - k_{pAKT} * pAKT \\
m\dot{T}OR &= -k_{mTOR\_pAKT} * mTOR * pAKT + k_{pmTOR} * pmTOR \\
pm\dot{T}OR &= k_{mTOR\_pAKT} * mTOR * pAKT - k_{pmTOR} * pmTOR \\
R\dot{a}f1 &= -k_{Raf1\_RasGTP} * Raf1 * RasGTP - k_{Raf1\_pPI3K} * Raf1 * pPI3K + \\
&+ k_{pRaf1\_pAKT} * pRaf1 * pAKT \\
pR\dot{a}f1 &= k_{Raf1\_RasGTP} * Raf1 * RasGTP + k_{Raf1\_pPI3K} * Raf1 * pPI3K - \\
&- k_{pRaf1\_pAKT} * pRaf1 * pAKT \\
ME\dot{K}12 &= -k_{MEK12\_pRaf1} * MEK12 * pRaf1 + k_{pMEK12} * pMEK12 \\
pME\dot{K}12 &= k_{MEK12\_pRaf1} * MEK12 * pRaf1 - k_{pMEK12} * pMEK12 \\
ER\dot{K}12 &= -k_{ERK12\_MEK12} * ERK12 * MEK12 - k_{ERK12\_pp38} * ERK12 * pp38 + k_{pERK12} * pERK12 \\
pER\dot{K}12 &= k_{ERK12\_MEK12} * ERK12 + MEK12 + k_{ERK12\_pp38} * ERK12 * pp38 - k_{pERK12} * pERK12 \\
P70\dot{S}6K &= -k_{P70S6K\_pERK12} * P70S6K * pERK12 - k_{P70S6K\_pmTOR} * P70S6K * pmTOR + \\
&+ k_{pP70S6K} * pP70S6K \\
pP70\dot{S}6K &= k_{P70S6K\_pERK12} * P70S6K * pERK12 + k_{P70S6K\_pmTOR} * P70S6K * pmTOR - \\
&- k_{pP70S6K} * pP70S6K \\
J\dot{N}K &= -k_{JNK\_pMKK47} * JNK * pMKK47 + k_{pJNK} * pJNK \\
pJ\dot{N}K &= k_{JNK\_pMKK47} * JNK * pMKK47 - k_{pJNK} * pJNK \\
cJ\dot{U}N &= -k_{cJUN\_pJNK} * cJUN * pJNK + k_{pcJUN} * pcJUN \\
pcJ\dot{U}N &= k_{cJUN\_pJNK} * cJUN * pJNK - k_{pcJUN} * pcJUN \\
BCL\dot{X}L &= k_{BCLXL\_pp38} * BCLXL * pp38 - k_{BCLXL\_pJNK} * BCLXL * pJNK \\
B\dot{A}X &= k_{BAX\_pp38} * BAX * pp38 - k_{BAX\_pJNK} * BAX * pJNK - k_{BAX} * BAX \\
I\dot{K}K &= -k_{IKK\_pMKK47} * IKK * pMKK47 - k_{IKK\_pAKT} * IKK * pAKT + k_{pIKK} * pIKK \\
pI\dot{K}K &= k_{IKK\_pMKK47} * IKK * pMKK47 + k_{IKK\_pAKT} * IKK * pAKT - k_{pIKK} * pIKK \\
NF\dot{k}B &= -k_{NFkB\_pIKK} * NFkB * pIKK + k_{pNFkB} * pNFkB \\
pNF\dot{k}B &= k_{NFkB\_pIKK} * NFkB * pIKK - k_{pNFkB} * pNFkB \\
PAR\dot{P} &= -k_{PARP\_pcJUN} * PARP * pcJUN - k_{PARP\_BAX} * PARP * BAX + \\
&+ k_{cPARP\_BCLXL} * cPARP * BCLXL + k_{cPARP\_pNFkB} * cPARP * pNFkB \\
cPAR\dot{P} &= k_{PARP\_pcJUN} * PARP * pcJUN + k_{PARP\_BAX} * PARP * BAX - \\
&- k_{cPARP\_BCLXL} * cPARP * BCLXL - k_{cPARP\_pNFkB} * cPARP * pNFkB
\end{aligned}$$



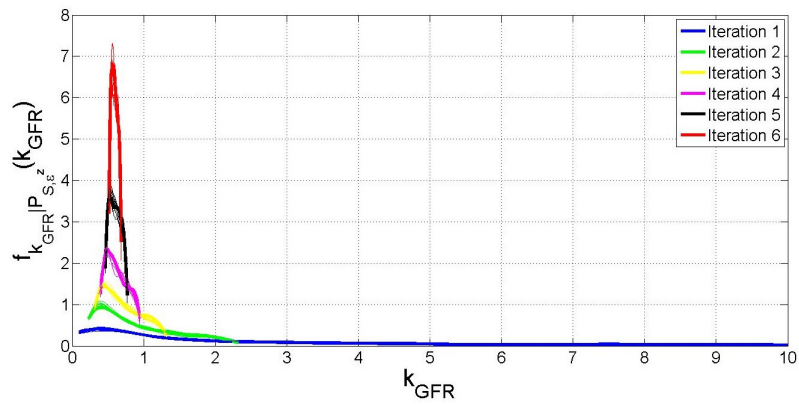

Figure S23: Model M3-CRC: conditional pdfs of the  $k_{GFR}$  parameter.

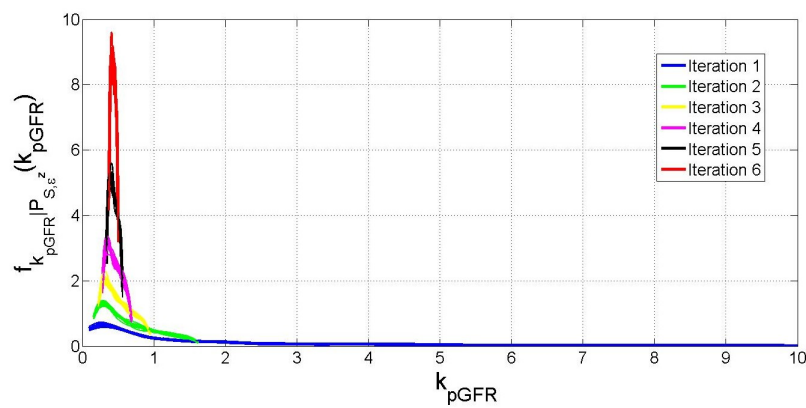

Figure S24: Model M3-CRC: conditional pdfs of the  $k_{pGFR}$  parameter.

| Iteration (z) | Time (min) |
|---------------|------------|
| 1             | 110        |
| 2             | 80         |
| 3             | 70         |
| 4             | 60         |
| 5             | 60         |
| 6             | 60         |

**Table S15.** Model M3-CRC: computational time for performing each iteration of CRC.

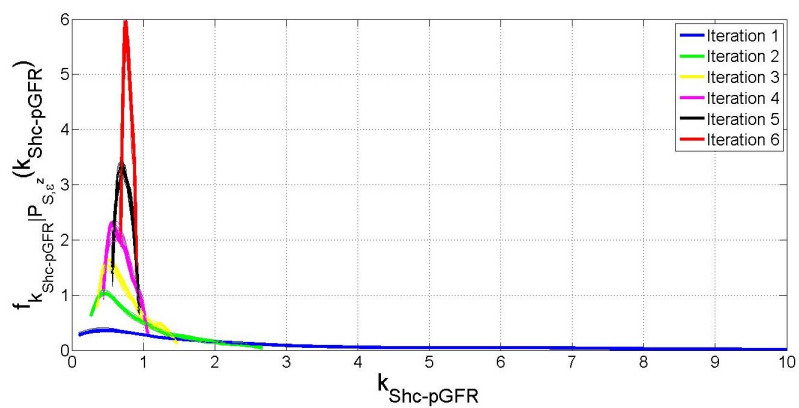

Figure S25: Model M3-CRC: conditional pdfs of the  $k_{Shc-pGFR}$  parameter.

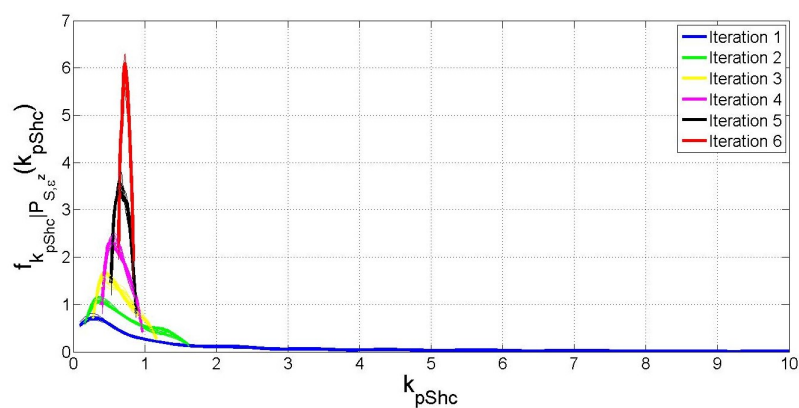

Figure S26: Model M3-CRC: conditional pdfs of the  $k_{pShc}$  parameter.

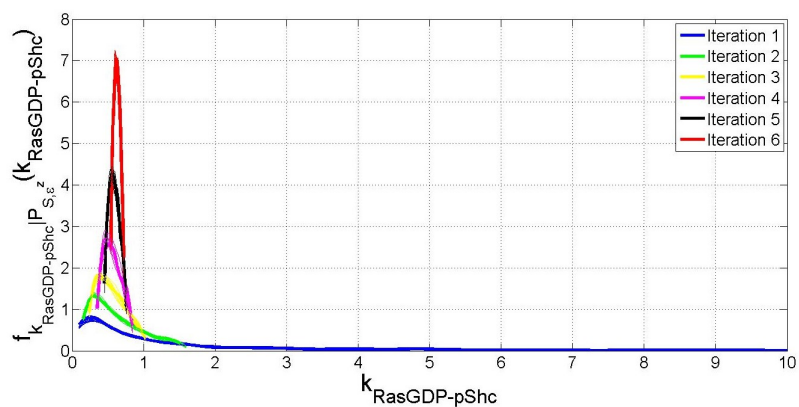

Figure S27: Model M3-CRC: conditional pdfs of the  $k_{RasGDP-pShc}$  parameter.

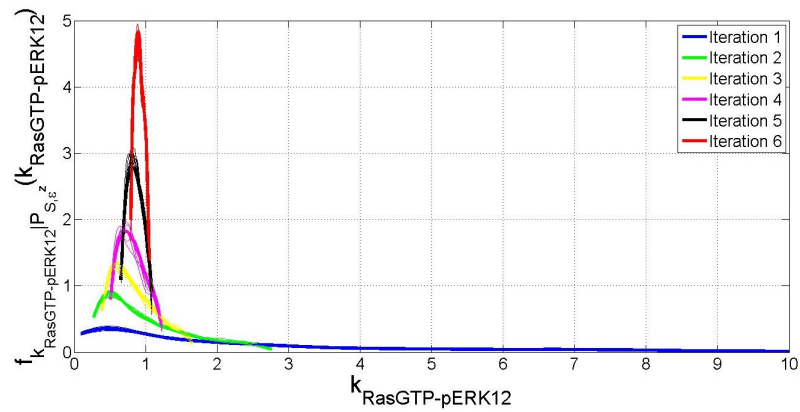

Figure S28: Model M3-CRC: conditional pdfs of the  $k_{RasGTP-pERK12}$  parameter.

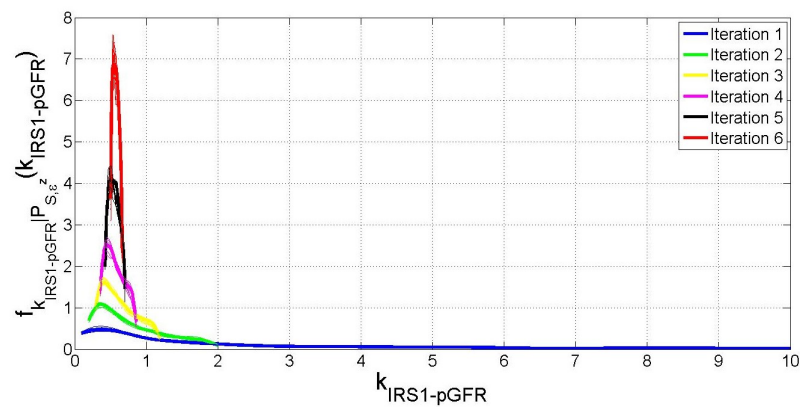

Figure S29: Model M3-CRC: conditional pdfs of the  $k_{IRS1-pGFR}$  parameter.

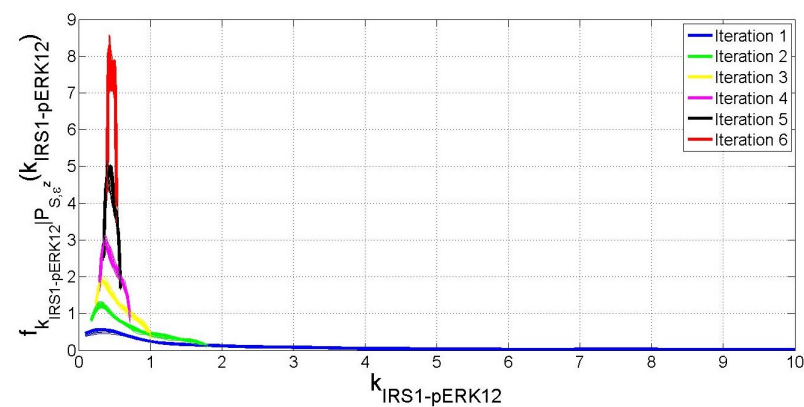

Figure S30: Model M3-CRC: conditional pdfs of the  $k_{pIRS1-pERK12}$  parameter.

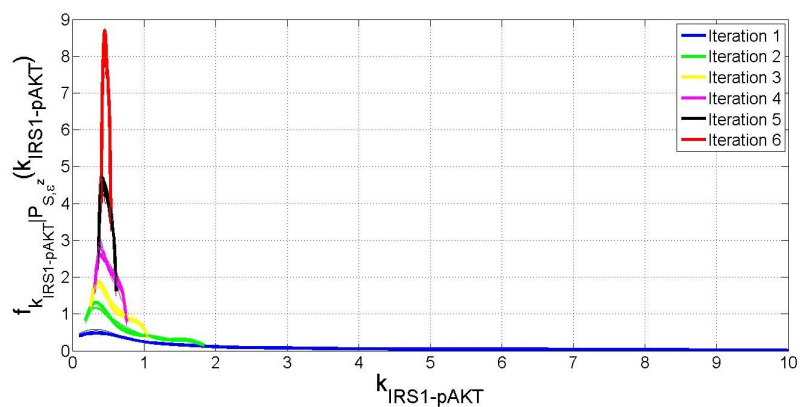

Figure S31: Model M3-CRC: conditional pdfs of the  $k_{pIRS1-pAKT}$  parameter.

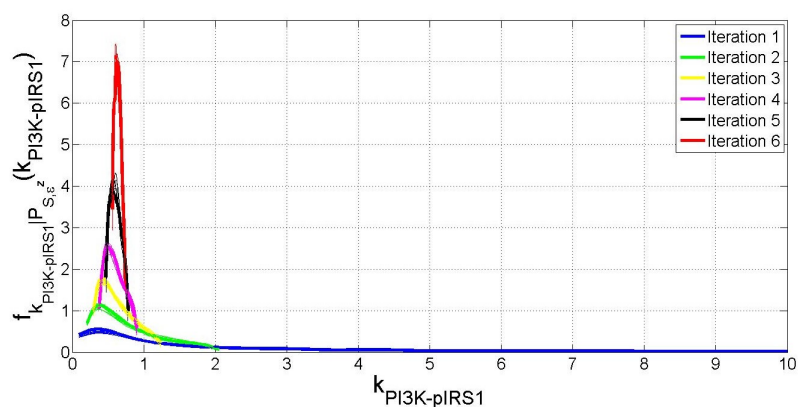

Figure S32: Model M3-CRC: conditional pdfs of the  $k_{pPI3K-pIRS1}$  parameter.

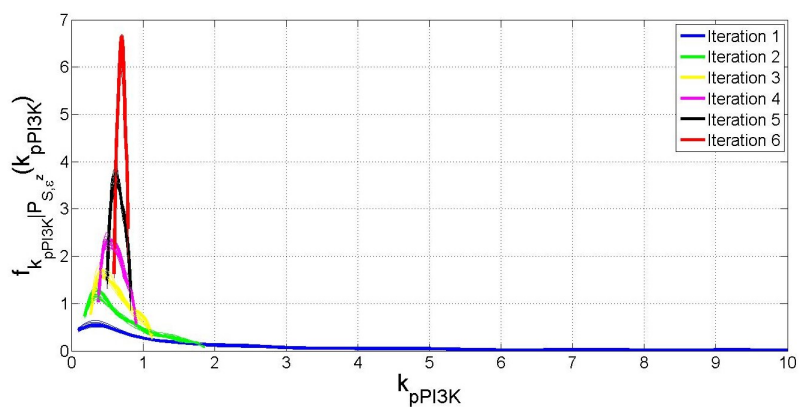

Figure S33: Model M3-CRC: conditional pdfs of the  $k_{pPI3K}$  parameter.

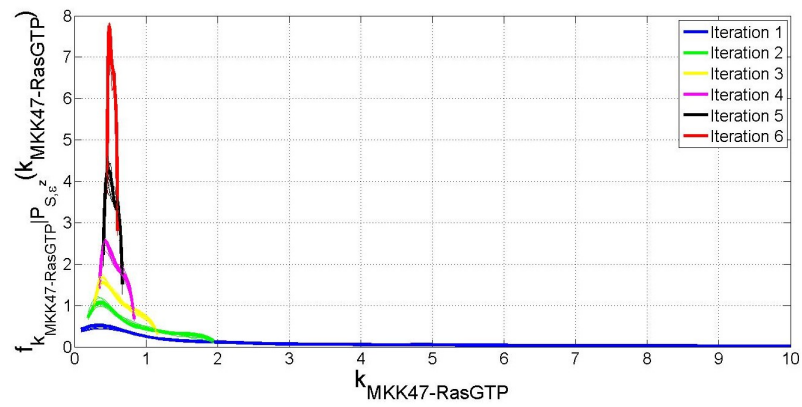

Figure S34: Model M3-CRC: conditional pdfs of the  $k_{MKK47-RasGTP}$  parameter.

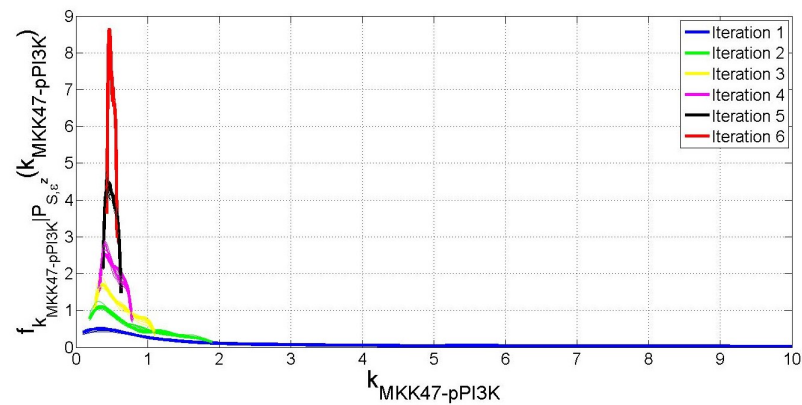

Figure S35: Model M3-CRC: conditional pdfs of the  $k_{MKK47-pPI3K}$  parameter.

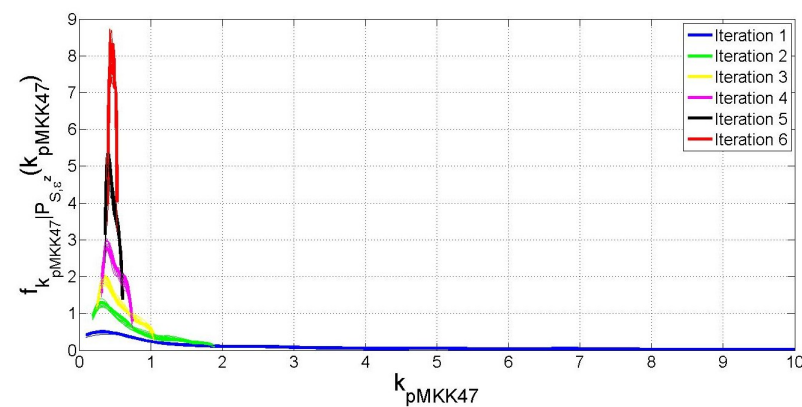

Figure S36: Model M3-CRC: conditional pdfs of the  $k_{pMKK47}$  parameter.

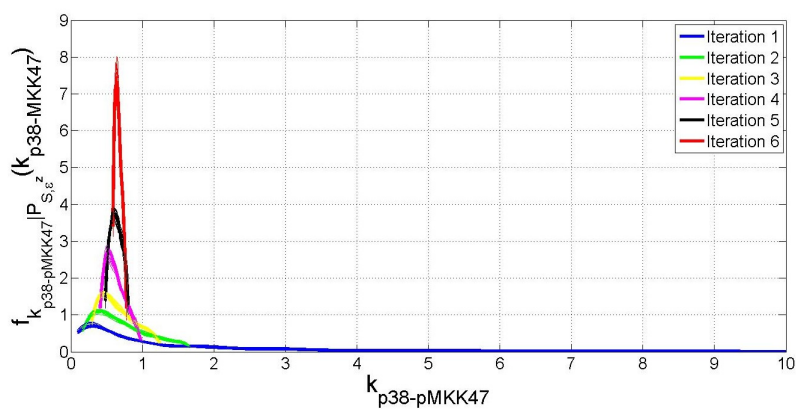

Figure S37: Model M3-CRC: conditional pdfs of the  $k_{p38-pMKK47}$  parameter.

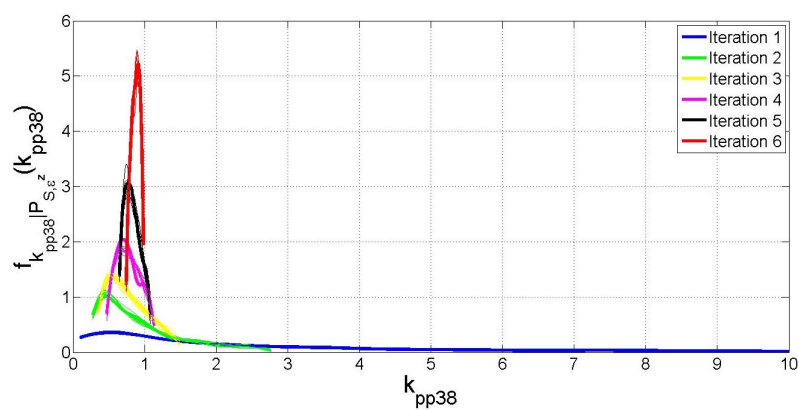

Figure S38: Model M3-CRC: conditional pdfs of the  $k_{pp38}$  parameter.

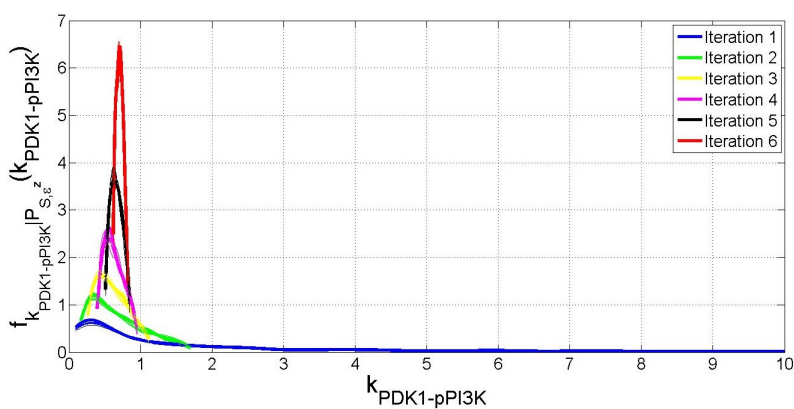

Figure S39: Model M3-CRC: conditional pdfs of the  $k_{PDK1-pPI3K}$  parameter.

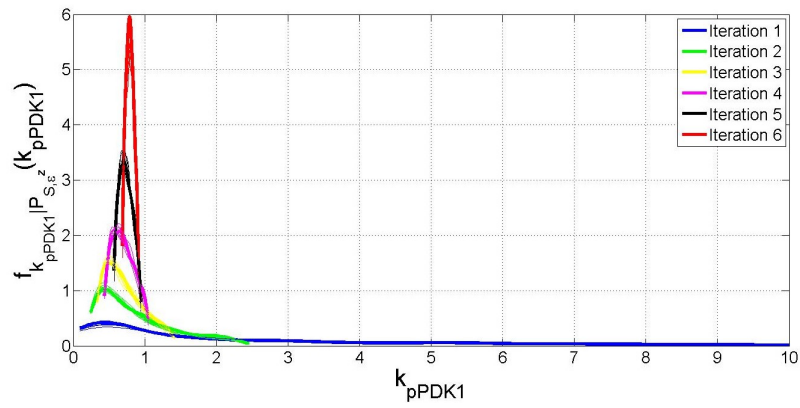

Figure S40: Model M3-CRC: conditional pdfs of the  $k_{pPDK1}$  parameter.

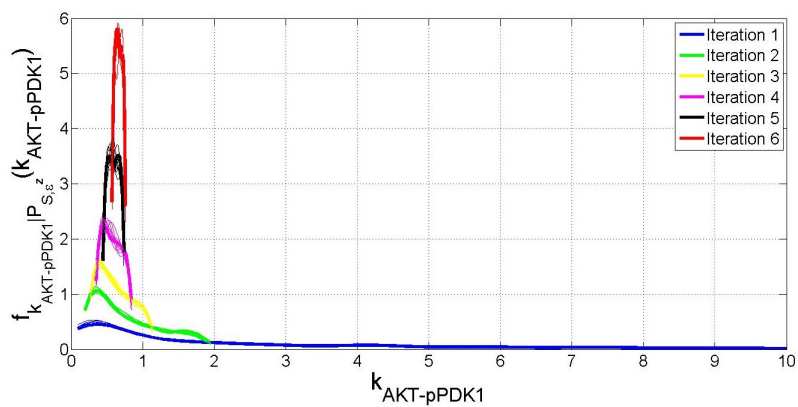

Figure S41: Model M3-CRC: conditional pdfs of the  $k_{AKT-pPDK1}$  parameter.

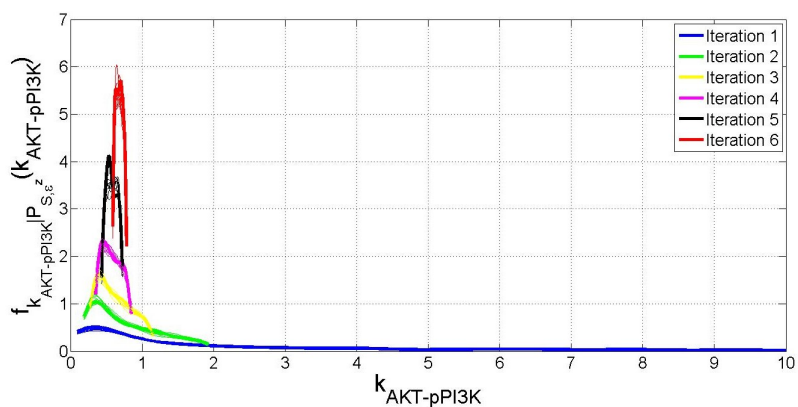

Figure S42: Model M3-CRC: conditional pdfs of the  $k_{AKT-pPI3K}$  parameter.

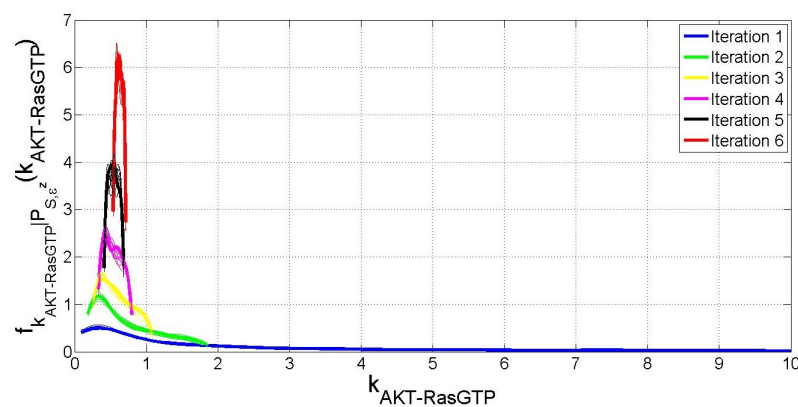

Figure S43: Model M3-CRC: conditional pdfs of the  $k_{AKT-RasGTP}$  parameter.



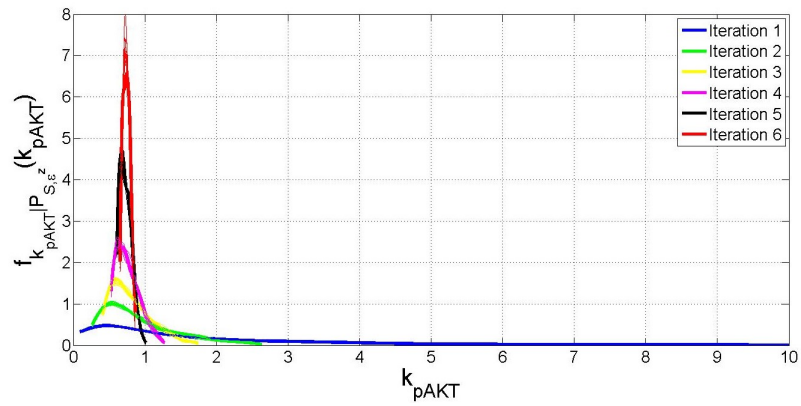

Figure S44: Model M3-CRC: conditional pdfs of the  $k_{pAKT}$  parameter.

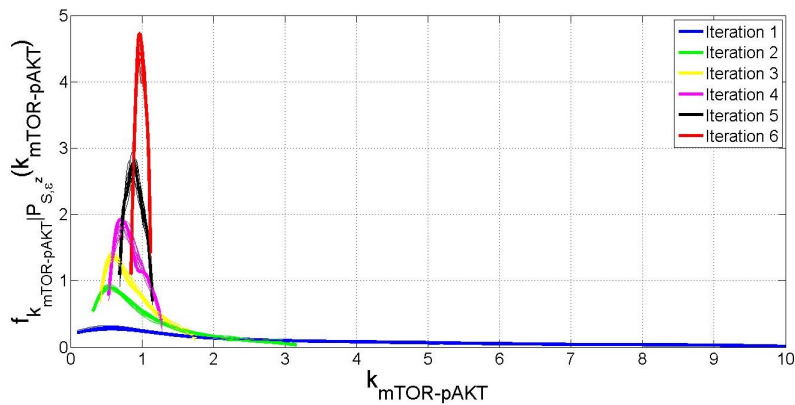

Figure S45: Model M3-CRC: conditional pdfs of the  $k_{mTOR-pAKT}$  parameter.

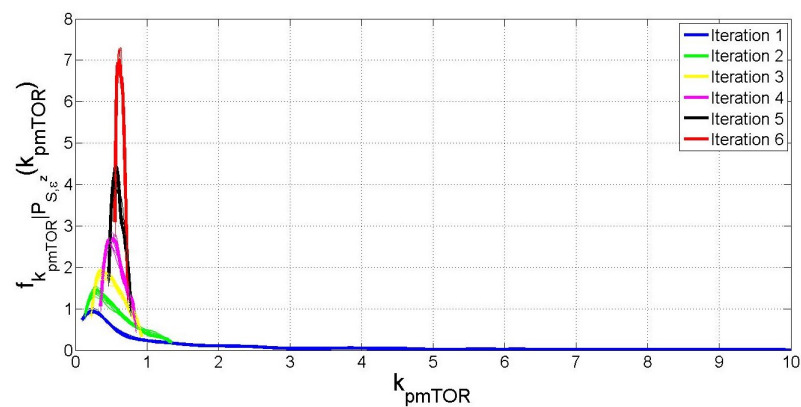

Figure S46: Model M3-CRC: conditional pdfs of the  $k_{pmTOR}$  parameter.

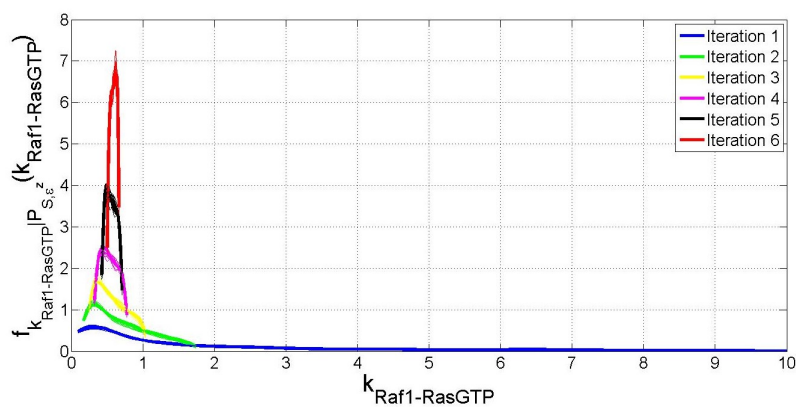

Figure S47: Model M3-CRC: conditional pdfs of the  $k_{Raf1-RasGTP}$  parameter.

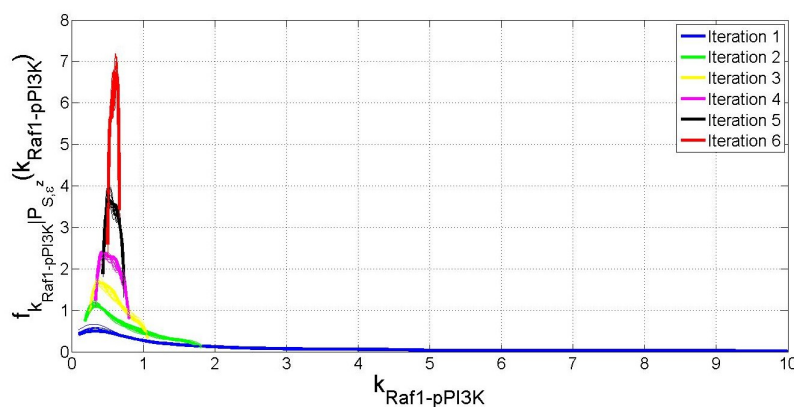

Figure S48: Model M3-CRC: conditional pdfs of the  $k_{Raf1-pI3K}$  parameter.

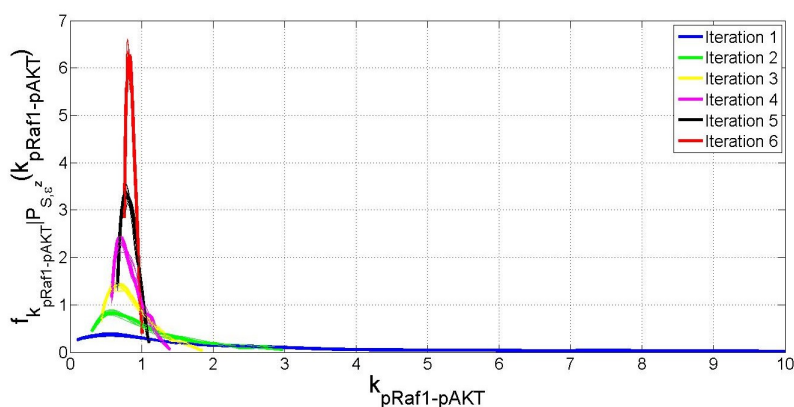

Figure S49: Model M3-CRC: conditional pdfs of the  $k_{pRaf1-pAKT}$  parameter.

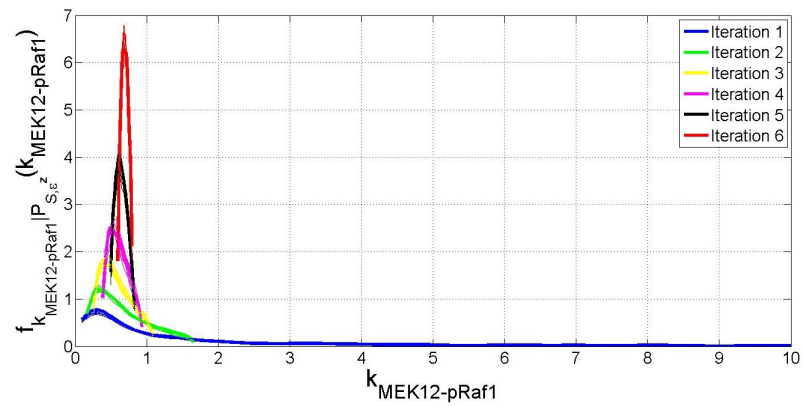

Figure S50: Model M3-CRC: conditional pdfs of the  $k_{MEK12-pRaf1}$  parameter.

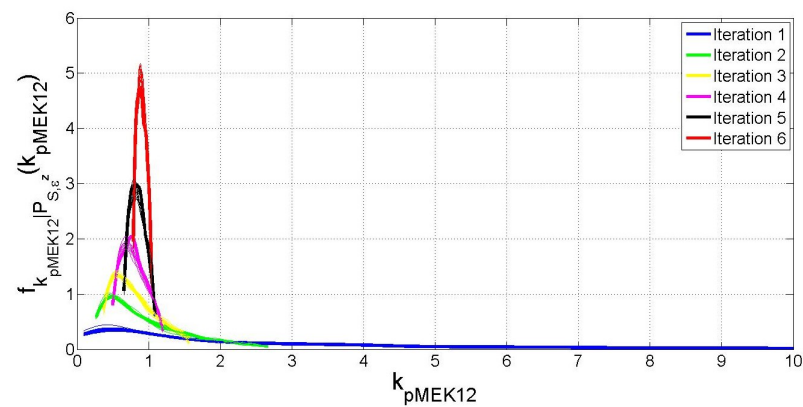

Figure S51: Model M3-CRC: conditional pdfs of the  $k_{pMEK12}$  parameter.

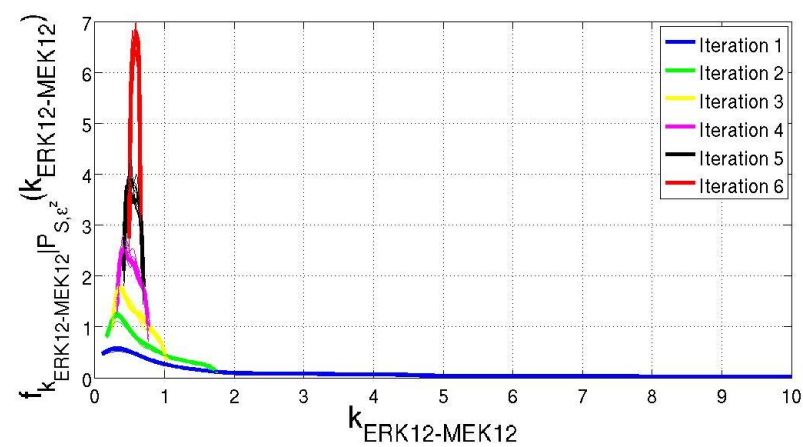

Figure S52: Model M3-CRC: conditional pdfs of the  $k_{ERK12-MEK12}$  parameter.

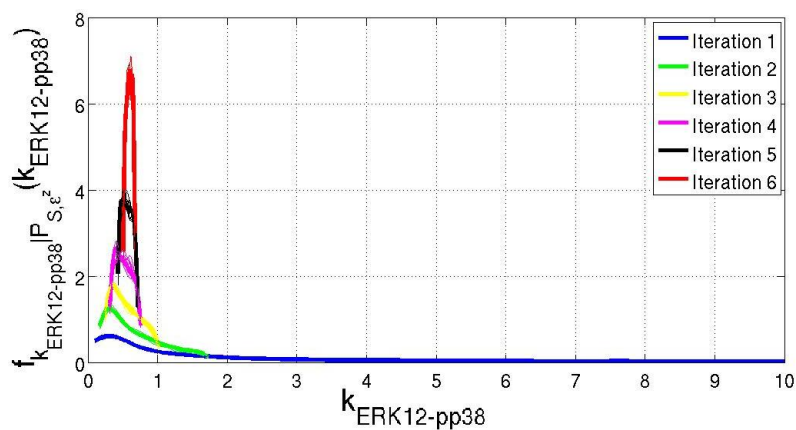

Figure S53: Model M3-CRC: conditional pdfs of the  $k_{ERK12-pp38}$  parameter.

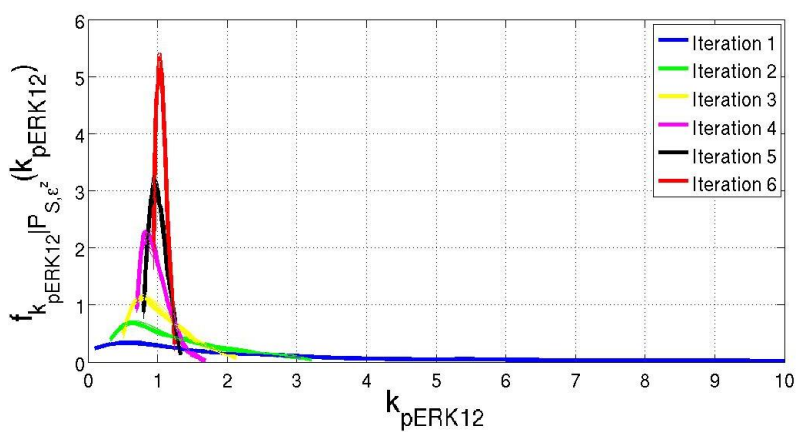

Figure S54: Model M3-CRC: conditional pdfs of the  $k_{pERK12}$  parameter.

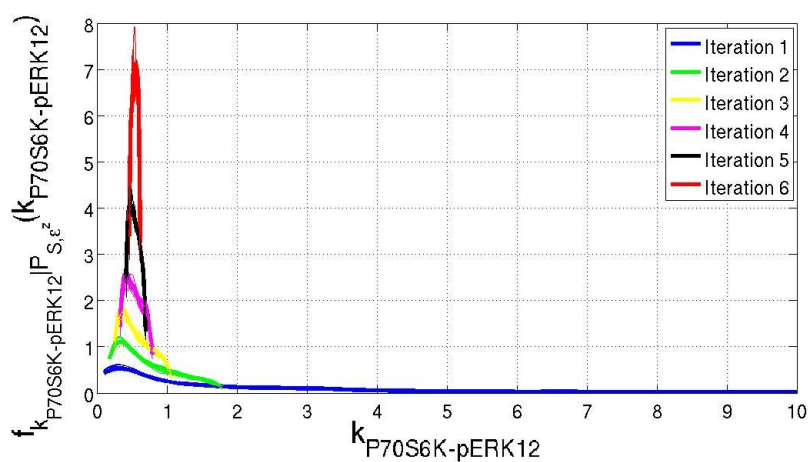

Figure S55: Model M3-CRC: conditional pdfs of the  $k_{P70S6K-pERK12}$  parameter.

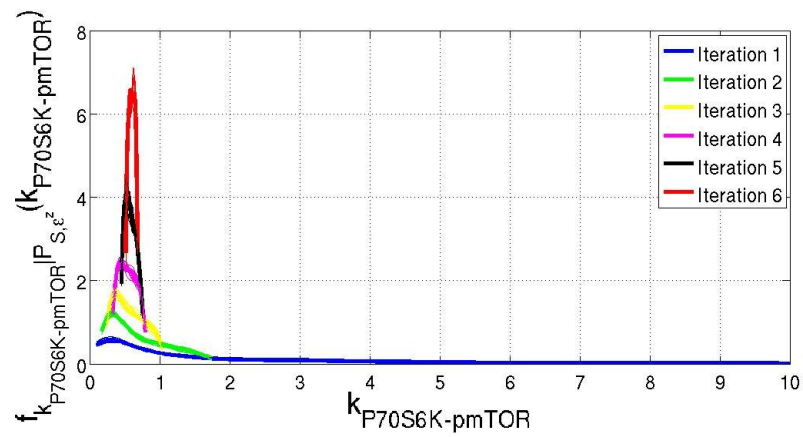

Figure S56: Model M3-CRC: conditional pdfs of the  $k_{P70S6K-pmTOR}$  parameter.

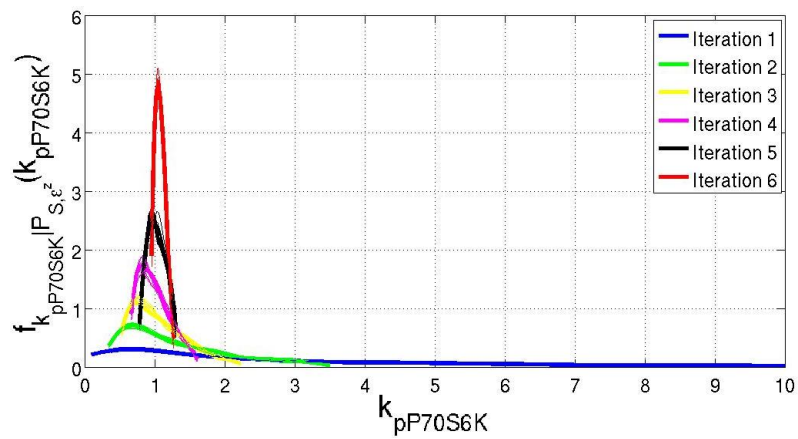

Figure S57: Model M3-CRC: conditional pdfs of the  $k_{pP70S6K}$  parameter.

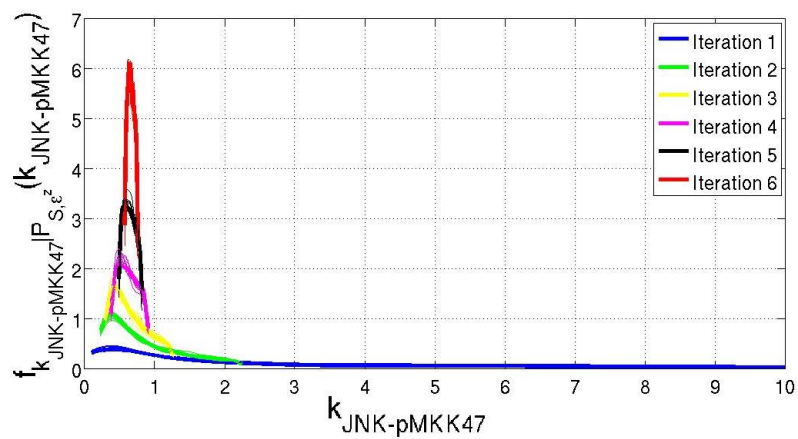

Figure S58: Model M3-CRC: conditional pdfs of the  $k_{JNK-pMKK47}$  parameter.

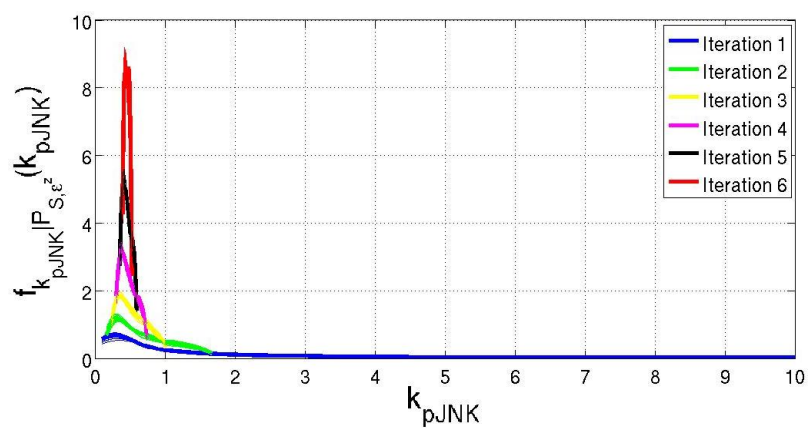

Figure S59: Model M3-CRC: conditional pdfs of the  $k_{pJNK}$  parameter.

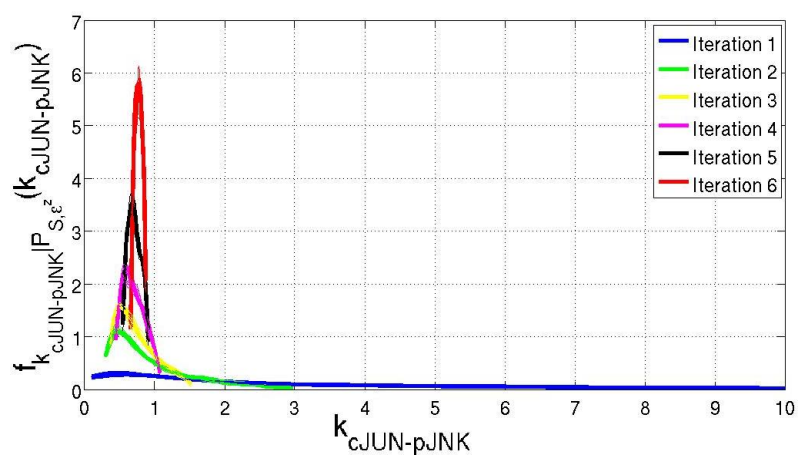

Figure S60: Model M3-CRC: conditional pdfs of the  $k_{cJUN-pJNK}$  parameter.

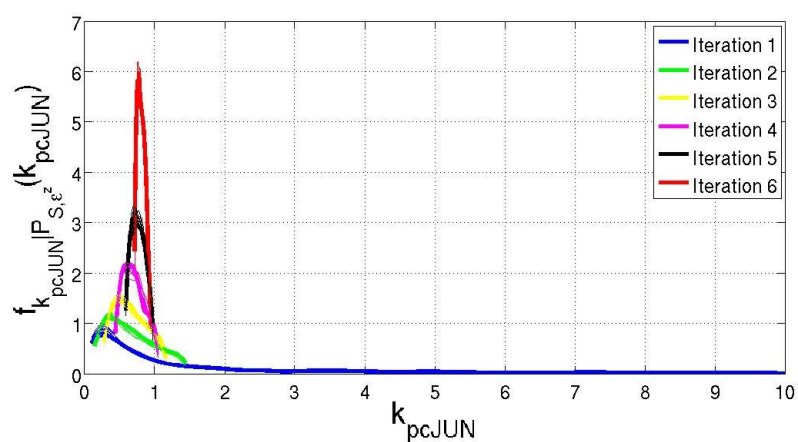

Figure S61: Model M3-CRC: conditional pdfs of the  $k_{pcJUN}$  parameter.

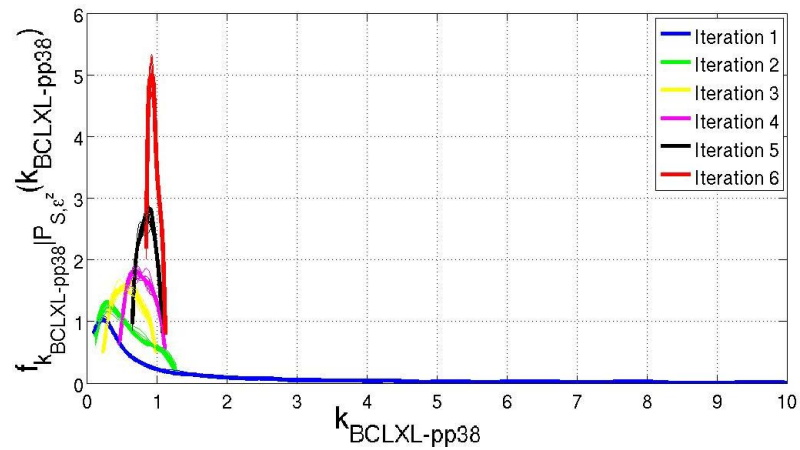

Figure S62: Model M3-CRC: conditional pdfs of the  $k_{BCLXL-pp38}$  parameter.

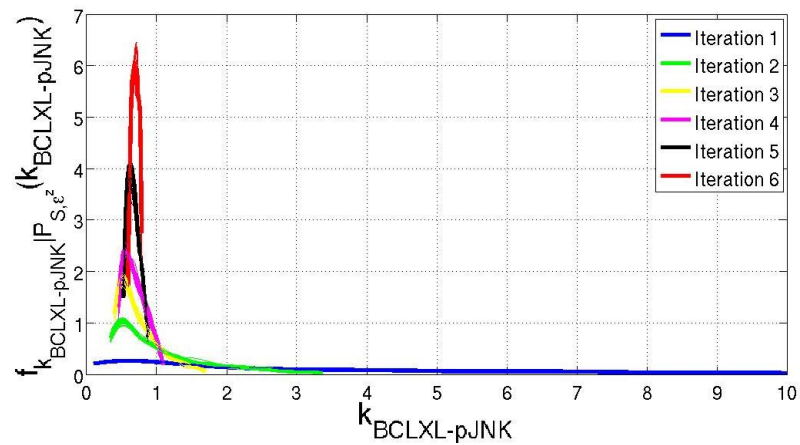

Figure S63: Model M3-CRC: conditional pdfs of the  $k_{BCLXL-pJNK}$  parameter.

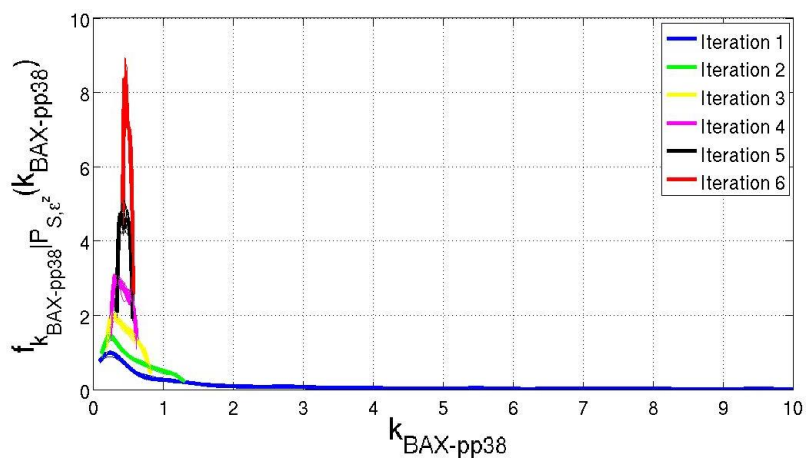

Figure S64: Model M3-CRC: conditional pdfs of the  $k_{BAX-pp38}$  parameter.



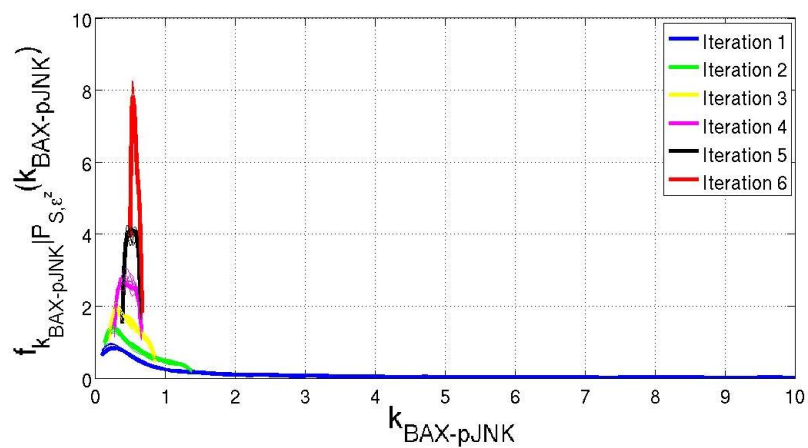

Figure S65: Model M3-CRC: conditional pdfs of the  $k_{BAX-pJNK}$  parameter.

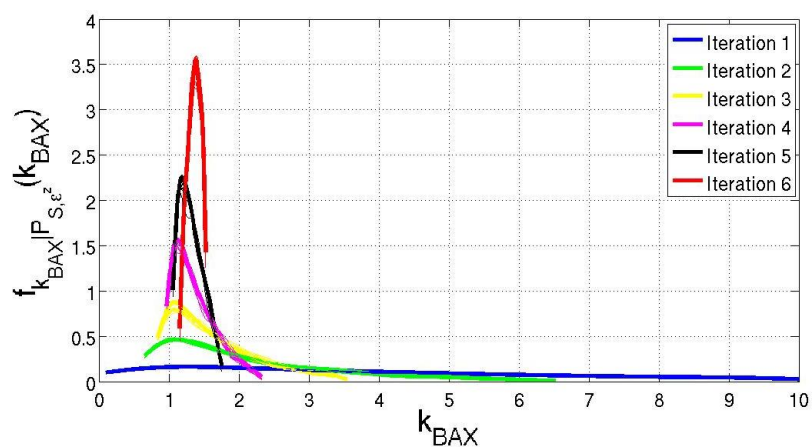

Figure S66: Model M3-CRC: conditional pdfs of the  $k_{BAX}$  parameter.

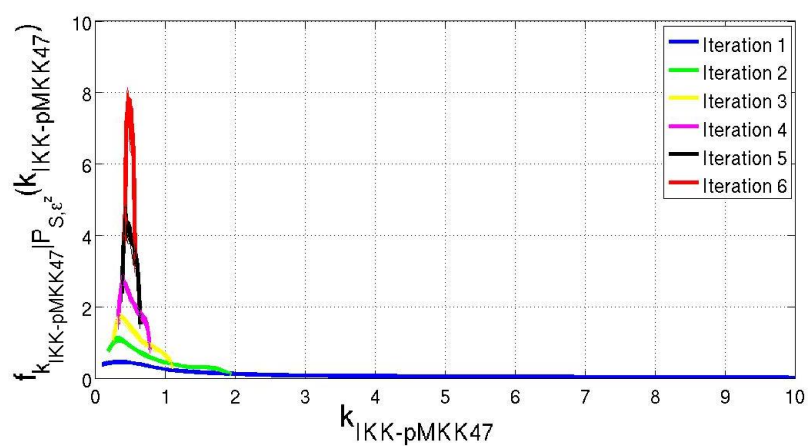

Figure S67: Model M3-CRC: conditional pdfs of the  $k_{IKK-pMKK47}$  parameter.



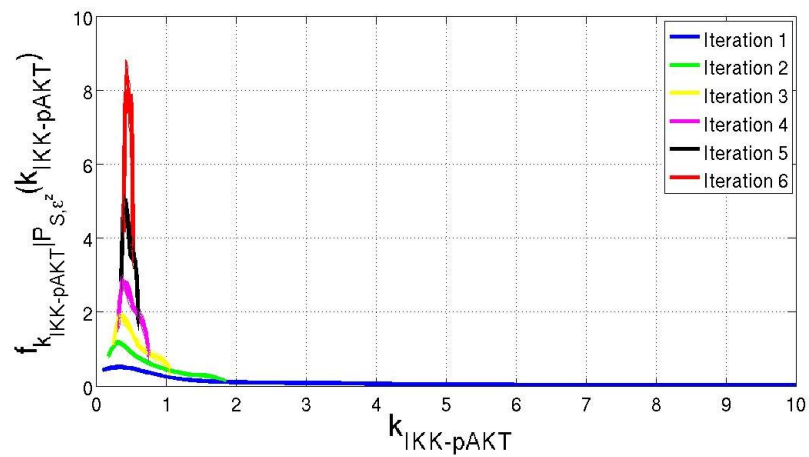

Figure S68: Model M3-CRC: conditional pdfs of the  $k_{IKK-pAKT}$  parameter.

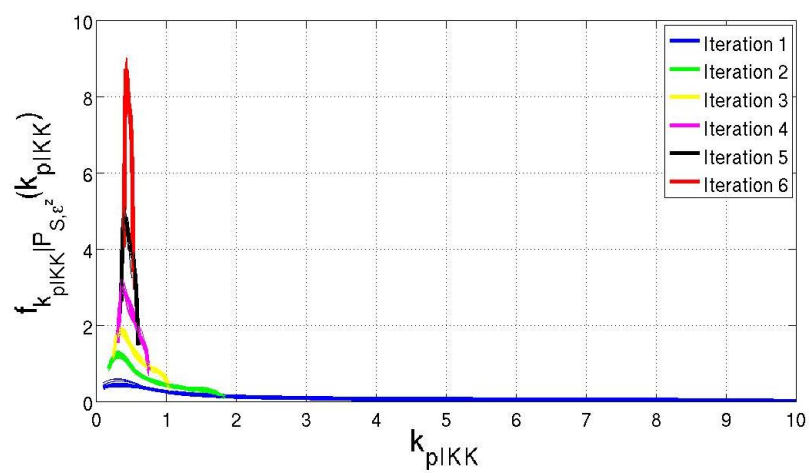

Figure S69: Model M3-CRC: conditional pdfs of the  $k_{pIKK}$  parameter.

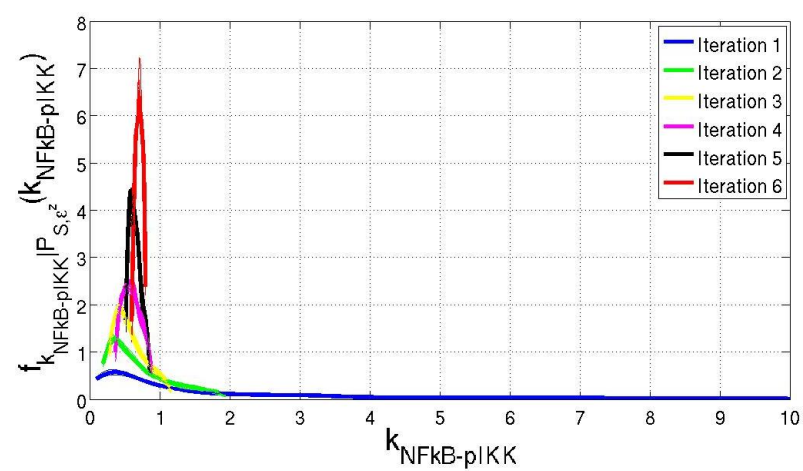

Figure S70: Model M3-CRC: conditional pdfs of the  $k_{NFkB-pIKK}$  parameter.

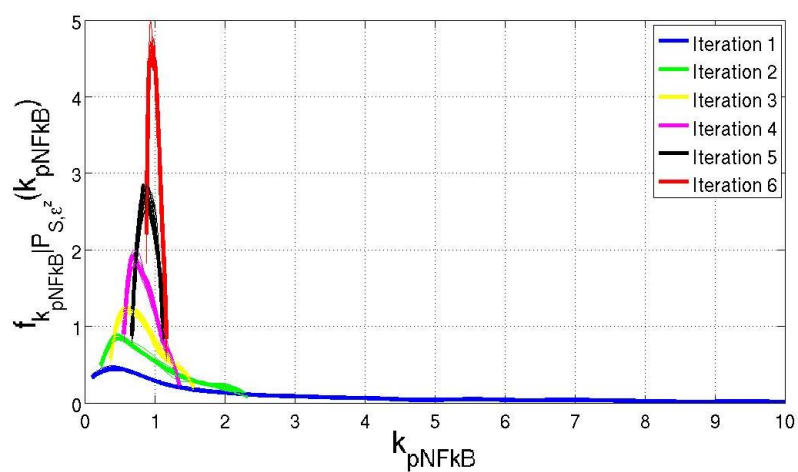

Figure S71: Model M3-CRC: conditional pdfs of the  $k_{pNFkB}$  parameter.

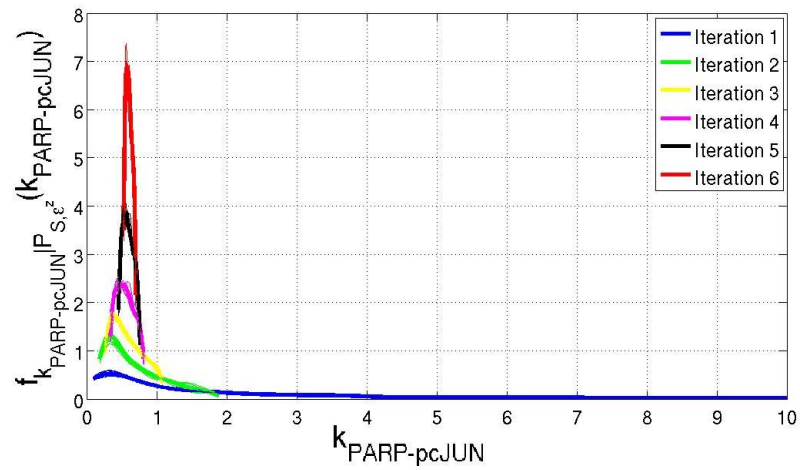

Figure S72: Model M3-CRC: conditional pdfs of the  $k_{PARP-pcJUN}$  parameter.

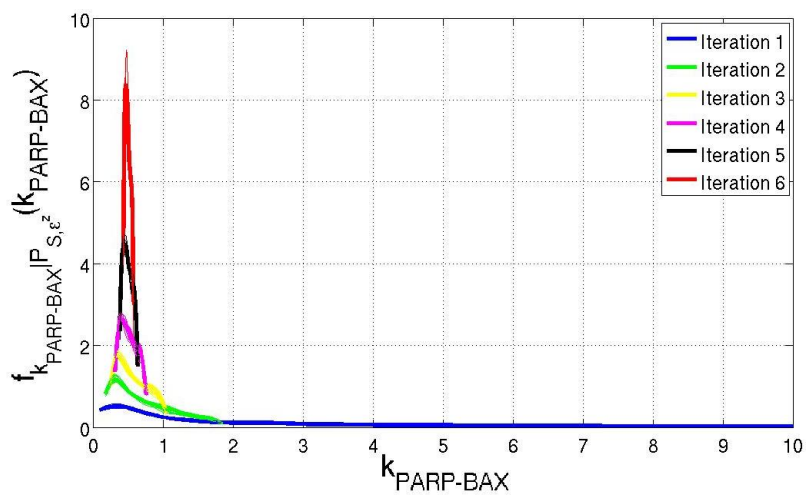

Figure S73: Model M3-CRC: conditional pdfs of the  $k_{PARP-BAX}$  parameter.

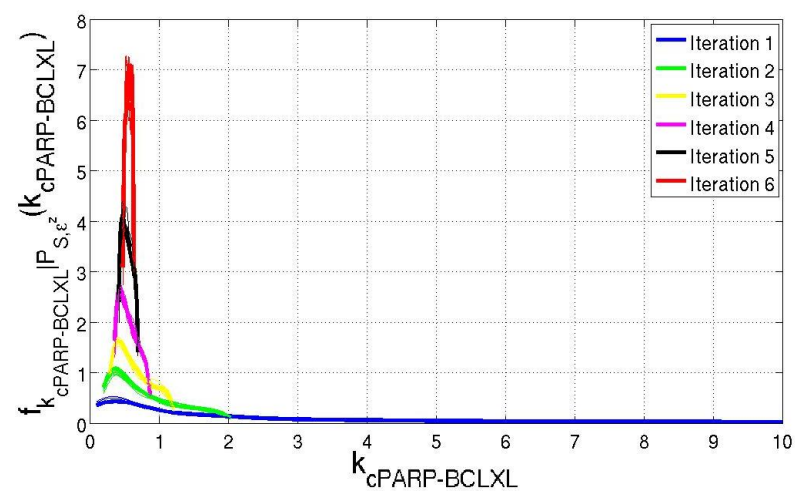

Figure S74: Model M3-CRC: conditional pdfs of the  $k_{cPARP-BCLXL}$  parameter.

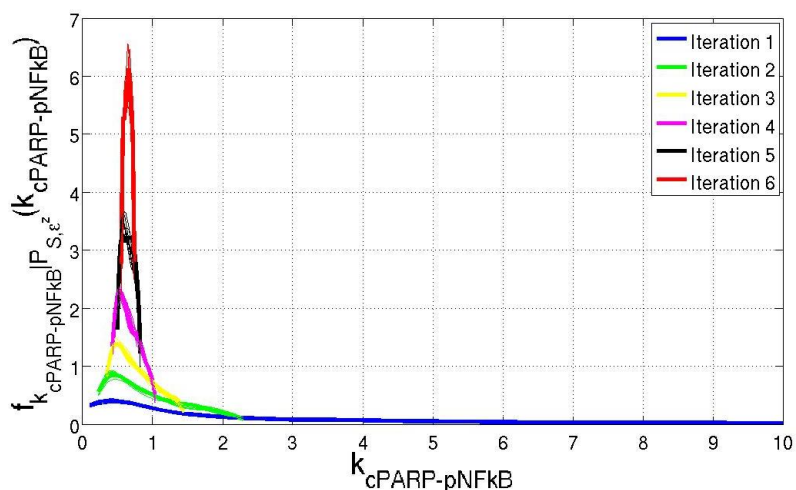

Figure S75: Model M3-CRC: conditional pdfs of the  $k_{cPARP-pNFkB}$  parameter.

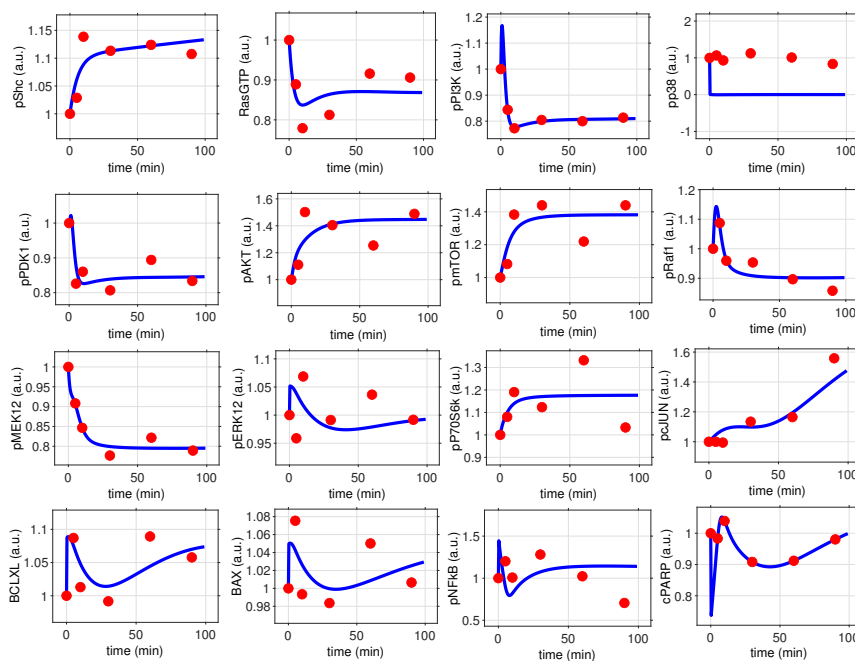

Figure S76: Model M3-PL: simulated output variables (blue lines) using best fit parameters returned by *lsqnonlin* in D2D software, in comparison with RPPA data (red dots).

| Parameter name      | Iteration 1 |        |          |
|---------------------|-------------|--------|----------|
|                     | Mean        | Mode   | Variance |
| $k_{GFR}$           | 2.6428      | 0.4222 | 8.1891   |
| $k_{pGFR}$          | 2.0697      | 0.2948 | 8.1891   |
| $k_{Shc.pGFR}$      | 2.5742      | 0.4850 | 8.1891   |
| $k_{pShc}$          | 1.8307      | 0.2938 | 8.1891   |
| $k_{RasGDP.pShc}$   | 1.7006      | 0.2893 | 8.1891   |
| $k_{RasGTP.pERK12}$ | 2.6164      | 0.5023 | 8.1891   |
| $k_{IRS1.pGFR}$     | 2.4432      | 0.3646 | 8.1891   |
| $k_{pIRS1.pERK12}$  | 2.3077      | 0.3273 | 8.1891   |
| $k_{pIRS1.pAKT}$    | 2.3970      | 0.3356 | 8.1891   |
| $k_{PI3K.pIRS1}$    | 2.2818      | 0.3732 | 8.1891   |
| $k_{pPI3K}$         | 2.1015      | 0.3375 | 8.1891   |
| $k_{MKK47.RasGTP}$  | 2.4564      | 0.3533 | 8.1891   |
| $k_{MKK47.pPI3K}$   | 2.4854      | 0.3456 | 8.1891   |
| $k_{pMKK47}$        | 2.3878      | 0.3444 | 8.1891   |
| $k_{p38.pMKK47}$    | 1.7639      | 0.3035 | 8.1891   |
| $k_{pp38}$          | 2.5979      | 0.5035 | 8.1891   |
| $k_{PDK1.pPI3K}$    | 1.9777      | 0.3087 | 8.1891   |
| $k_{pPDK1}$         | 2.4943      | 0.4460 | 8.1891   |
| $k_{AKT.pPDK1}$     | 2.4556      | 0.3542 | 8.1891   |
| $k_{AKT.pPI3K}$     | 2.4602      | 0.3506 | 8.1891   |
| $k_{AKT.RasGTP}$    | 2.3608      | 0.3383 | 8.1891   |
| $k_{pAKT}$          | 2.0209      | 0.4781 | 8.1891   |
| $k_{mTOR.pAKT}$     | 2.9470      | 0.5752 | 8.1891   |
| $k_{pmTOR}$         | 1.5913      | 0.2450 | 8.1891   |
| $k_{Raf1.RasGTP}$   | 2.1298      | 0.3174 | 8.1891   |
| $k_{Raf1.pPI3K}$    | 2.2175      | 0.3306 | 8.1891   |
| $k_{pRaf1.pAKT}$    | 2.6456      | 0.5410 | 8.1891   |
| $k_{MEK12.pRaf1}$   | 1.7806      | 0.3008 | 8.1891   |
| $k_{pMEK12}$        | 2.5954      | 0.4842 | 8.1891   |
| $k_{ERK12.MEK12}$   | 2.1513      | 0.3192 | 8.1891   |
| $k_{ERK12.pp38}$    | 2.1174      | 0.3138 | 8.1891   |
| $k_{pERK12}$        | 2.6293      | 0.5823 | 8.1891   |
| $k_{P70S6K.pERK12}$ | 2.1589      | 0.3245 | 8.1891   |
| $k_{P70S6K.pmTOR}$  | 2.0891      | 0.3159 | 8.1891   |
| $k_{pP70S6K}$       | 2.6831      | 0.6373 | 8.1891   |
| $k_{JNK.pMKK47}$    | 2.5811      | 0.4082 | 8.1891   |
| $k_{pJNK}$          | 2.0664      | 0.3026 | 8.1891   |
| $k_{cJUN.pJNK}$     | 2.8219      | 0.5409 | 8.1891   |
| $k_{pcJUN}$         | 1.6580      | 0.2624 | 8.1891   |
| $k_{BCLXL.pp38}$    | 1.4953      | 0.2318 | 8.1891   |
| $k_{BCLXL.pJNK}$    | 3.0574      | 0.6130 | 8.1891   |
| $k_{BAX.pp38}$      | 1.4828      | 0.2371 | 8.1891   |
| $k_{BAX.pJNK}$      | 1.6553      | 0.2510 | 8.1891   |
| $k_{BAX}$           | 3.8068      | 1.1849 | 8.1891   |
| $k_{IKK.pMKK47}$    | 2.4871      | 0.3540 | 8.1891   |
| $k_{IKK.pAKT}$      | 2.4250      | 0.3367 | 8.1891   |
| $k_{pIKK}$          | 2.3950      | 0.3349 | 8.1891   |
| $k_{NFkB.pIKK}$     | 2.0127      | 0.3531 | 8.1891   |
| $k_{pNFkB}$         | 2.2628      | 0.4230 | 8.1891   |
| $k_{PARP.pcJUN}$    | 2.1648      | 0.3428 | 8.1891   |
| $k_{PARP.BAX}$      | 2.3078      | 0.3375 | 8.1891   |
| $k_{cPARP.BCLXL}$   | 2.4996      | 0.3720 | 8.1891   |
| $k_{cPARP.pNFkB}$   | 2.5531      | 0.4158 | 8.1891   |

Table S16. Model M3-CRC: summary statistics of parameter pdfs in iteration 1 of CRC algorithm.

| Protein name | Iteration 1 |          |
|--------------|-------------|----------|
|              | Mean        | Variance |
| pShc         | 0.4518      | 0.0560   |
| RasGTP       | 0.5741      | 0.0835   |
| pPI3K        | 0.5875      | 0.0840   |
| pp38         | 0.4935      | 0.0591   |
| pPDK1        | 0.5841      | 0.0774   |
| pAKT         | 0.3139      | 0.0315   |
| pmTOR        | 0.3840      | 0.0504   |
| pRaf1        | 0.5019      | 0.0670   |
| pMEK12       | 0.5829      | 0.0986   |
| pERK12       | 0.4661      | 0.0565   |
| pP70S6K      | 0.3911      | 0.0367   |
| pcJUN        | 0.4571      | 0.0511   |
| BCLXL        | 5.8866      | 356.7352 |
| BAX          | 6.3346      | 217.1105 |
| pNFkB        | 0.4851      | 0.0496   |
| cPARP        | 0.5472      | 0.0660   |

**Table S17.** Model M3-CRC: summary statistics of distance function pdfs in iteration 1 of CRC algorithm.

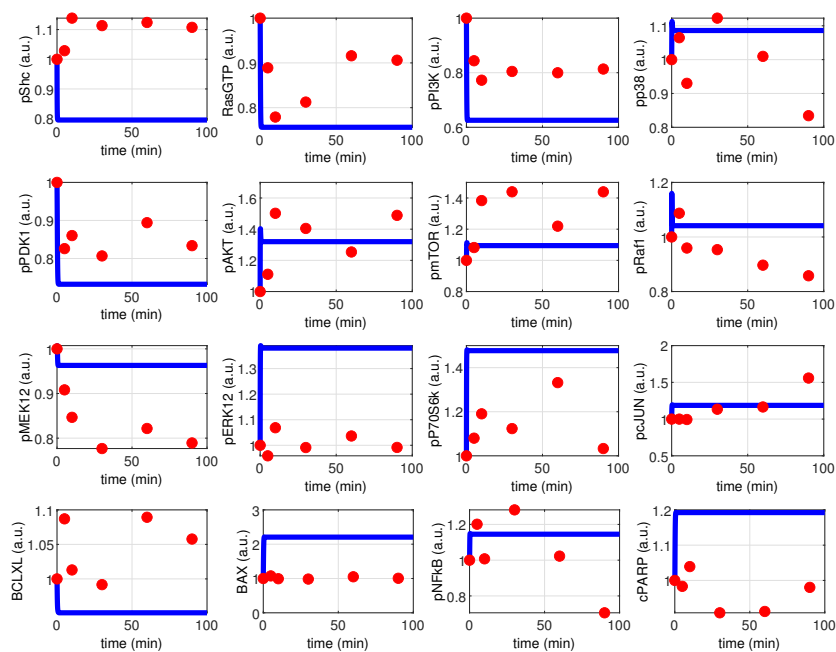

**Figure S77:** Model M3-ABC SMC: simulated output variables (blue lines) using the median parameter vector returned by the standard ABC-SMC in the 4 – *th* iteration, in comparison with the experimental dataset (red dots).

| Parameter name      | Iteration 2 |        |          |
|---------------------|-------------|--------|----------|
|                     | Mean        | Mode   | Variance |
| $k_{GFR}$           | 0.9400      | 0.4066 | 0.3651   |
| $k_{pGFR}$          | 0.6730      | 0.2915 | 0.1779   |
| $k_{Shc.pGFR}$      | 0.9480      | 0.4528 | 0.4816   |
| $k_{pShc}$          | 0.7122      | 0.3578 | 0.1767   |
| $k_{RasGDP.pShc}$   | 0.6454      | 0.3139 | 0.1713   |
| $k_{RasGTP.pERK12}$ | 1.0606      | 0.5070 | 0.5165   |
| $k_{IRS1.pGFR}$     | 0.8248      | 0.3673 | 0.2721   |
| $k_{pIRS1.pERK12}$  | 0.7309      | 0.3120 | 0.2193   |
| $k_{pIRS1.pAKT}$    | 0.7576      | 0.3268 | 0.2306   |
| $k_{PI3K.pIRS1}$    | 0.8138      | 0.3816 | 0.2852   |
| $k_{pPI3K}$         | 0.7423      | 0.3480 | 0.2332   |
| $k_{MKK47.RasGTP}$  | 0.8158      | 0.3576 | 0.2555   |
| $k_{MKK47.pPI3K}$   | 0.7981      | 0.3388 | 0.2446   |
| $k_{pMKK47}$        | 0.7479      | 0.3222 | 0.2429   |
| $k_{p38.pMKK47}$    | 0.7295      | 0.3825 | 0.1886   |
| $k_{pp38}$          | 0.9674      | 0.4591 | 0.5189   |
| $k_{PDK1.pPI3K}$    | 0.7105      | 0.3436 | 0.1951   |
| $k_{pPDK1}$         | 0.9080      | 0.4357 | 0.4072   |
| $k_{AKT.pPDK1}$     | 0.8172      | 0.3505 | 0.2569   |
| $k_{AKT.pPI3K}$     | 0.8064      | 0.3542 | 0.2516   |
| $k_{AKT.RasGTP}$    | 0.7703      | 0.3357 | 0.2343   |
| $k_{pAKT}$          | 0.9379      | 0.5354 | 0.4680   |
| $k_{mTOR.pAKT}$     | 1.1185      | 0.5393 | 0.6772   |
| $k_{pmTOR}$         | 0.5768      | 0.2855 | 0.1229   |
| $k_{Raf1.RasGTP}$   | 0.7369      | 0.3196 | 0.2062   |
| $k_{Raf1.pPI3K}$    | 0.7552      | 0.3277 | 0.2238   |
| $k_{pRaf1.pAKT}$    | 1.1049      | 0.5696 | 0.5993   |
| $k_{MEK12.pRaf1}$   | 0.6846      | 0.3356 | 0.1853   |
| $k_{pMEK12}$        | 0.9864      | 0.4811 | 0.4800   |
| $k_{ERK12.MEK12}$   | 0.7237      | 0.3167 | 0.2086   |
| $k_{ERK12.pp38}$    | 0.7009      | 0.3138 | 0.2015   |
| $k_{pERK12}$        | 1.2731      | 0.6529 | 0.6941   |
| $k_{P70S6K.pERK12}$ | 0.7503      | 0.3271 | 0.2156   |
| $k_{P70S6K.pmTOR}$  | 0.7196      | 0.3180 | 0.2043   |
| $k_{pP70S6K}$       | 1.3212      | 0.6863 | 0.8315   |
| $k_{JNK.pMKK47}$    | 0.8994      | 0.3906 | 0.3411   |
| $k_{pJNK}$          | 0.6966      | 0.3114 | 0.1875   |
| $k_{cJUN.pJNK}$     | 0.9664      | 0.4668 | 0.5990   |
| $k_{pcJUN}$         | 0.6670      | 0.3582 | 0.1410   |
| $k_{BCLXL.pp38}$    | 0.5981      | 0.3037 | 0.1100   |
| $k_{BCLXL.pJNK}$    | 1.1118      | 0.5225 | 0.7693   |
| $k_{BAX.pp38}$      | 0.5718      | 0.2531 | 0.1151   |
| $k_{BAX.pJNK}$      | 0.6005      | 0.2658 | 0.1289   |
| $k_{BAX}$           | 2.1943      | 1.0903 | 2.8743   |
| $k_{IKK.pMKK47}$    | 0.8084      | 0.3423 | 0.2565   |
| $k_{IKK.pAKT}$      | 0.7630      | 0.3268 | 0.2321   |
| $k_{pIKK}$          | 0.7581      | 0.3240 | 0.2296   |
| $k_{NFkB.pIKK}$     | 0.7320      | 0.3555 | 0.2553   |
| $k_{pNFkB}$         | 0.9606      | 0.4769 | 0.3664   |
| $k_{PARP.pcJUN}$    | 0.7438      | 0.3329 | 0.2406   |
| $k_{PARP.BAX}$      | 0.7523      | 0.3218 | 0.2332   |
| $k_{cPARP.BCLXL}$   | 0.8593      | 0.3741 | 0.2827   |
| $k_{cPARP.pNFkB}$   | 0.9754      | 0.4438 | 0.3540   |

Table S18. Model M3-CRC: summary statistics of parameter pdfs in iteration 2 of CRC algorithm.

| Protein name | Iteration 2 |          |
|--------------|-------------|----------|
|              | Mean        | Variance |
| pShc         | 0.2847      | 0.0282   |
| RasGTP       | 0.3806      | 0.0538   |
| pPI3K        | 0.3841      | 0.0594   |
| pp38         | 0.3218      | 0.0342   |
| pPDK1        | 0.3809      | 0.05     |
| pAKT         | 0.2001      | 0.0136   |
| pmTOR        | 0.2226      | 0.0128   |
| pRaf1        | 0.3002      | 0.0332   |
| pMEK12       | 0.3645      | 0.0483   |
| pERK12       | 0.2811      | 0.0303   |
| pP70S6K      | 0.2449      | 0.0205   |
| pcJUN        | 0.2974      | 0.0199   |
| BCLXL        | 0.6064      | 0.1093   |
| BAX          | 0.5338      | 0.1219   |
| pNfkb        | 0.3239      | 0.0241   |
| cPARP        | 0.3220      | 0.0399   |

**Table S19.** Model M3-CRC: summary statistics of distance function pdfs in iteration 2 of CRC algorithm.

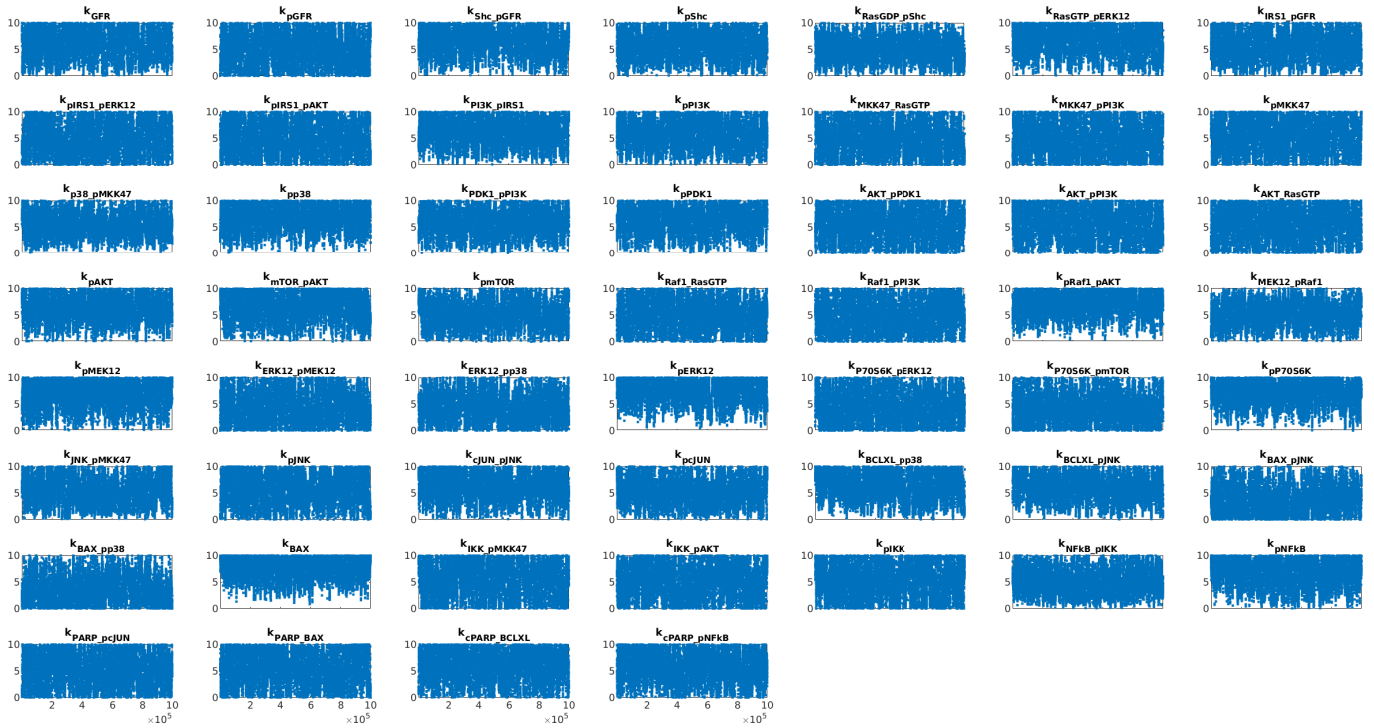

**Figure S78:** Model M3-DRAM: chains of model parameters computed by DRAM after six run using a lognormal prior. The initial error variance  $\sigma$  is set equal to 0.1 and the corresponding prior weight is set to 10.



| Parameter name      | Iteration 3 |        |          |
|---------------------|-------------|--------|----------|
|                     | Mean        | Mode   | Variance |
| $k_{GFR}$           | 0.7173      | 0.4462 | 0.0846   |
| $k_{pGFR}$          | 0.5167      | 0.3234 | 0.0435   |
| $k_{Shc.pGFR}$      | 0.7539      | 0.5005 | 0.1049   |
| $k_{pShc}$          | 0.6480      | 0.4553 | 0.0655   |
| $k_{RasGDP.pShc}$   | 0.5620      | 0.3970 | 0.0504   |
| $k_{RasGTP.pERK12}$ | 0.8594      | 0.5776 | 0.1316   |
| $k_{IRS1.pGFR}$     | 0.6419      | 0.4042 | 0.0690   |
| $k_{pIRS1.pERK12}$  | 0.5519      | 0.3376 | 0.0498   |
| $k_{pIRS1.pAKT}$    | 0.5811      | 0.3575 | 0.0547   |
| $k_{PI3K.pIRS1}$    | 0.6498      | 0.4255 | 0.0745   |
| $k_{pPI3K}$         | 0.6177      | 0.4264 | 0.0620   |
| $k_{MKK47.RasGTP}$  | 0.6367      | 0.3936 | 0.0655   |
| $k_{MKK47.pPI3K}$   | 0.6041      | 0.3688 | 0.0588   |
| $k_{pMKK47}$        | 0.5663      | 0.3505 | 0.0531   |
| $k_{p38.pMKK47}$    | 0.6742      | 0.4633 | 0.0749   |
| $k_{pp38}$          | 0.7870      | 0.5318 | 0.1079   |
| $k_{PDK1.pPI3K}$    | 0.6154      | 0.4482 | 0.0604   |
| $k_{pPDK1}$         | 0.7316      | 0.4947 | 0.0971   |
| $k_{AKT.pPDK1}$     | 0.6363      | 0.3959 | 0.0629   |
| $k_{AKT.pPI3K}$     | 0.6408      | 0.3983 | 0.0642   |
| $k_{AKT.RasGTP}$    | 0.6091      | 0.3758 | 0.0577   |
| $k_{pAKT}$          | 0.8243      | 0.5979 | 0.1467   |
| $k_{mTOR.pAKT}$     | 0.8835      | 0.6035 | 0.1489   |
| $k_{pmTOR}$         | 0.5252      | 0.4002 | 0.0417   |
| $k_{Raf1.RasGTP}$   | 0.5820      | 0.3651 | 0.0523   |
| $k_{Raf1.pPI3K}$    | 0.5921      | 0.3776 | 0.0550   |
| $k_{pRaf1.pAKT}$    | 0.8853      | 0.6581 | 0.1661   |
| $k_{MEK12.pRaf1}$   | 0.5910      | 0.4387 | 0.0577   |
| $k_{pMEK12}$        | 0.8156      | 0.5632 | 0.1184   |
| $k_{ERK12.MEK12}$   | 0.5718      | 0.3593 | 0.0513   |
| $k_{ERK12.pp38}$    | 0.5635      | 0.3560 | 0.0504   |
| $k_{pERK12}$        | 1.0647      | 0.7933 | 0.2182   |
| $k_{P70S6K.pERK12}$ | 0.5939      | 0.3725 | 0.0547   |
| $k_{P70S6K.pmTOR}$  | 0.5794      | 0.3748 | 0.0518   |
| $k_{pP70S6K}$       | 1.0858      | 0.7552 | 0.2411   |
| $k_{JNK.pMKK47}$    | 0.6770      | 0.4263 | 0.0781   |
| $k_{pJNK}$          | 0.5542      | 0.3510 | 0.0496   |
| $k_{cJUN.pJNK}$     | 0.7566      | 0.5045 | 0.1115   |
| $k_{pcJUN}$         | 0.6630      | 0.4944 | 0.0657   |
| $k_{BCLXL.pp38}$    | 0.6011      | 0.5268 | 0.0472   |
| $k_{BCLXL.pJNK}$    | 0.7737      | 0.5144 | 0.1397   |
| $k_{BAX.pp38}$      | 0.4713      | 0.2934 | 0.0328   |
| $k_{BAX.pJNK}$      | 0.4926      | 0.3117 | 0.0362   |
| $k_{BAX}$           | 1.6607      | 1.0950 | 0.6084   |
| $k_{IKK.pMKK47}$    | 0.6080      | 0.3722 | 0.0600   |
| $k_{IKK.pAKT}$      | 0.5761      | 0.3565 | 0.0547   |
| $k_{pIKK}$          | 0.5713      | 0.3534 | 0.0537   |
| $k_{NFkB.pIKK}$     | 0.5997      | 0.4189 | 0.0647   |
| $k_{pNFkB}$         | 0.8499      | 0.6348 | 0.1164   |
| $k_{PARP.pcJUN}$    | 0.5946      | 0.3830 | 0.0567   |
| $k_{PARP.BAX}$      | 0.5766      | 0.3577 | 0.0530   |
| $k_{cPARP.BCLXL}$   | 0.6595      | 0.4107 | 0.0716   |
| $k_{cPARP.pNFkB}$   | 0.7713      | 0.4864 | 0.1008   |

Table S20. Model M3-CRC: summary statistics of parameter pdfs in iteration 3 of CRC algorithm.

| Protein name | Iteration 3 |          |
|--------------|-------------|----------|
|              | Mean        | Variance |
| pShc         | 0.19        | 0.0147   |
| RasGTP       | 0.2628      | 0.0280   |
| pPI3K        | 0.2656      | 0.0336   |
| pp38         | 0.2150      | 0.0155   |
| pPDK1        | 0.2565      | 0.0275   |
| pAKT         | 0.1499      | 0.0058   |
| pmTOR        | 0.1601      | 0.0056   |
| pRaf1        | 0.2035      | 0.0155   |
| pMEK12       | 0.2492      | 0.0256   |
| pERK12       | 0.1881      | 0.0149   |
| pP70S6K      | 0.1759      | 0.0106   |
| pcJUN        | 0.2115      | 0.009    |
| BCLXL        | 0.4484      | 0.0498   |
| BAX          | 0.3834      | 0.0430   |
| pNFkB        | 0.2394      | 0.0088   |
| cPARP        | 0.2122      | 0.0194   |

**Table S21.** Model M3-CRC: summary statistics of distance functions pdfs in iteration 3 of CRC algorithm.

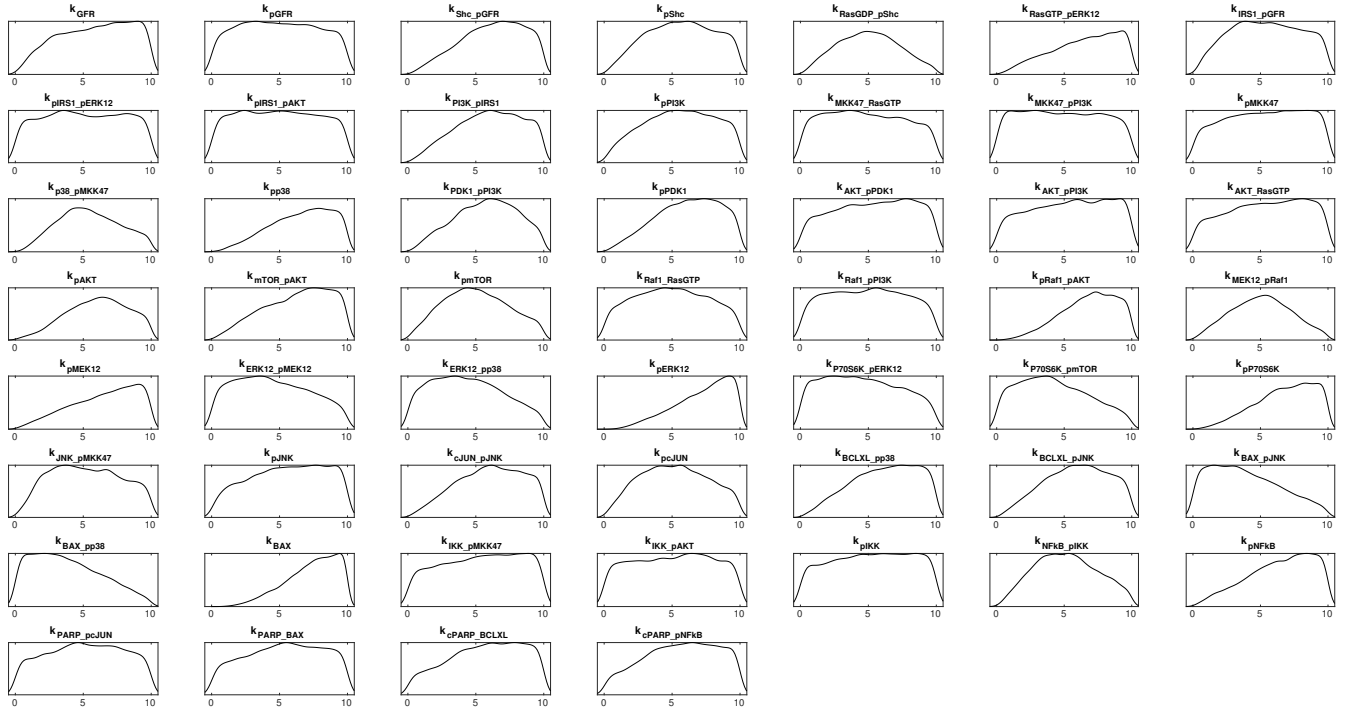

**Figure S79:** Model M3-DRAM: pdf of model parameters computed by DRAM after six run using a lognormal prior. The initial error variance  $\sigma$  is set equal to 0.1 and the corresponding prior weight is set to 10.

| Parameter name      | Iteration 4 |         |          |
|---------------------|-------------|---------|----------|
|                     | Mean        | Mode    | Variance |
| $k_{GFR}$           | 0.6371      | 0.4930  | 0.0255   |
| $k_{pGFR}$          | 0.4632      | 0.3578  | 0.0134   |
| $k_{Shc.pGFR}$      | 0.7047      | 0.6026  | 0.0321   |
| $k_{pShc}$          | 0.6491      | 0.5628  | 0.0265   |
| $k_{RasGDP.pShc}$   | 0.5661      | 0.4847  | 0.0202   |
| $k_{RasGTP.pERK12}$ | 0.8195      | 0.6964  | 0.430    |
| $k_{IRS1.pGFR}$     | 0.5781      | 0.4511  | 0.0209   |
| $k_{pIRS1.pERK12}$  | 0.4833      | 0.3729  | 0.0146   |
| $k_{pIRS1.pAKT}$    | 0.5130      | 0.3898  | 0.0164   |
| $k_{PI3K.pIRS1}$    | 0.6032      | 0.4996  | 0.0232   |
| $k_{pPI3K}$         | 0.6141      | 0.5614  | 0.0233   |
| $k_{MKK47.RasGTP}$  | 0.5652      | 0.4298  | 0.0198   |
| $k_{MKK47.pPI3K}$   | 0.5281      | 0.4023  | 0.0174   |
| $k_{pMKK47}$        | 0.5021      | 0.3880  | 0.0157   |
| $k_{p38.pMKK47}$    | 0.6334      | 0.5116  | 0.0275   |
| $k_{pp38}$          | 0.7775      | 0.6908  | 0.0362   |
| $k_{PDK1.pPI3K}$    | 0.6347      | 0.5424  | 0.0257   |
| $k_{pPDK1}$         | 0.7065      | 0.6060  | 0.0313   |
| $k_{AKT.pPDK1}$     | 0.5800      | 0.4729  | 0.0201   |
| $k_{AKT.pPI3K}$     | 0.5829      | 0.4623  | 0.0203   |
| $k_{AKT.RasGTP}$    | 0.5490      | 0.4372  | 0.0181   |
| $k_{pAKT}$          | 0.7711      | 0.6460  | 0.0458   |
| $k_{mTOR.pAKT}$     | 0.8547      | 0.7333  | 0.466    |
| $k_{pmTOR}$         | 0.5705      | 0.4969  | 0.0205   |
| $k_{Raf1.RasGTP}$   | 0.5396      | 0.4534  | 0.0171   |
| $k_{Raf1.pPI3K}$    | 0.5563      | 0.4663  | 0.0182   |
| $k_{pRaf1.pAKT}$    | 0.8485      | 0.7048  | 0.0554   |
| $k_{MEK12.pRaf1}$   | 0.6209      | 0.5300  | 0.0246   |
| $k_{pMEK12}$        | 0.7998      | 0.6971  | 0.0406   |
| $k_{ERK12.MEK12}$   | 0.5261      | 0.4425  | 0.0165   |
| $k_{ERK12.pp38}$    | 0.5247      | 0.4592  | 0.0162   |
| $k_{pERK12}$        | 0.9879      | 0.8497  | 0.0805   |
| $k_{P70S6K.pERK12}$ | 0.5460      | 0.4444  | 0.0178   |
| $k_{P70S6K.pmTOR}$  | 0.5511      | 0.4837  | 0.0180   |
| $k_{pP70S6K}$       | 1.0138      | 0.8337  | 0.0730   |
| $k_{JNK.pMKK47}$    | 0.6243      | 0.5215  | 0.0233   |
| $k_{pJNK}$          | 0.4900      | 0.3806  | 0.0158   |
| $k_{cJUN.pJNK}$     | 0.7100      | 0.5804  | 0.0326   |
| $k_{pcJUN}$         | 0.7070      | 0.6248  | 0.0313   |
| $k_{BCLXL.pp38}$    | 0.7825      | 0.6939  | 0.0355   |
| $k_{BCLXL.pJNK}$    | 0.7029      | 0.55586 | 0.0339   |
| $k_{BAX.pp38}$      | 0.4354      | 0.3634  | 0.0110   |
| $k_{BAX.pJNK}$      | 0.4669      | 0.4168  | 0.0124   |
| $k_{BAX}$           | 1.3900      | 1.1227  | 0.1535   |
| $k_{IKK.pMKK47}$    | 0.5348      | 0.4133  | 0.0177   |
| $k_{IKK.pAKT}$      | 0.5116      | 0.3878  | 0.0163   |
| $k_{pIKK}$          | 0.5019      | 0.3846  | 0.0160   |
| $k_{NFkB.pIKK}$     | 0.6113      | 0.5496  | 0.0225   |
| $k_{pNFkB}$         | 0.8763      | 0.7189  | 0.0516   |
| $k_{PARP.pcJUN}$    | 0.5595      | 0.4879  | 0.0188   |
| $k_{PARP.BAX}$      | 0.5188      | 0.4083  | 0.0164   |
| $k_{cPARP.BCLXL}$   | 0.5800      | 0.44476 | 0.0216   |
| $k_{cPARP.pNFkB}$   | 0.6814      | 0.5274  | 0.0303   |

Table S22. Model M3-CRC: summary statistics of parameter pdfs in iteration 4 of CRC algorithm.

| Iteration 4  |        |          |
|--------------|--------|----------|
| Protein name | Mean   | Variance |
| pShc         | 0.1202 | 0.0061   |
| RasGTP       | 0.1775 | 0.0128   |
| pPI3K        | 0.1675 | 0.0138   |
| pp38         | 0.1535 | 0.0064   |
| pPDK1        | 0.1673 | 0.0126   |
| pAKT         | 0.1157 | 0.0016   |
| pmTOR        | 0.1160 | 0.0016   |
| pRaf1        | 0.1391 | 0.0062   |
| pMEK12       | 0.1621 | 0.0107   |
| pERK12       | 0.1293 | 0.0071   |
| pP70S6K      | 0.1259 | 0.0044   |
| pcJUN        | 0.1546 | 0.0035   |
| BCLXL        | 0.2775 | 0.0379   |
| BAX          | 0.2796 | 0.0235   |
| pNFkB        | 0.1895 | 0.0021   |
| cPARP        | 0.1492 | 0.0097   |

**Table S23.** Model M3-CRC: summary statistics of distance function pdfs in iteration 4 of CRC algorithm.

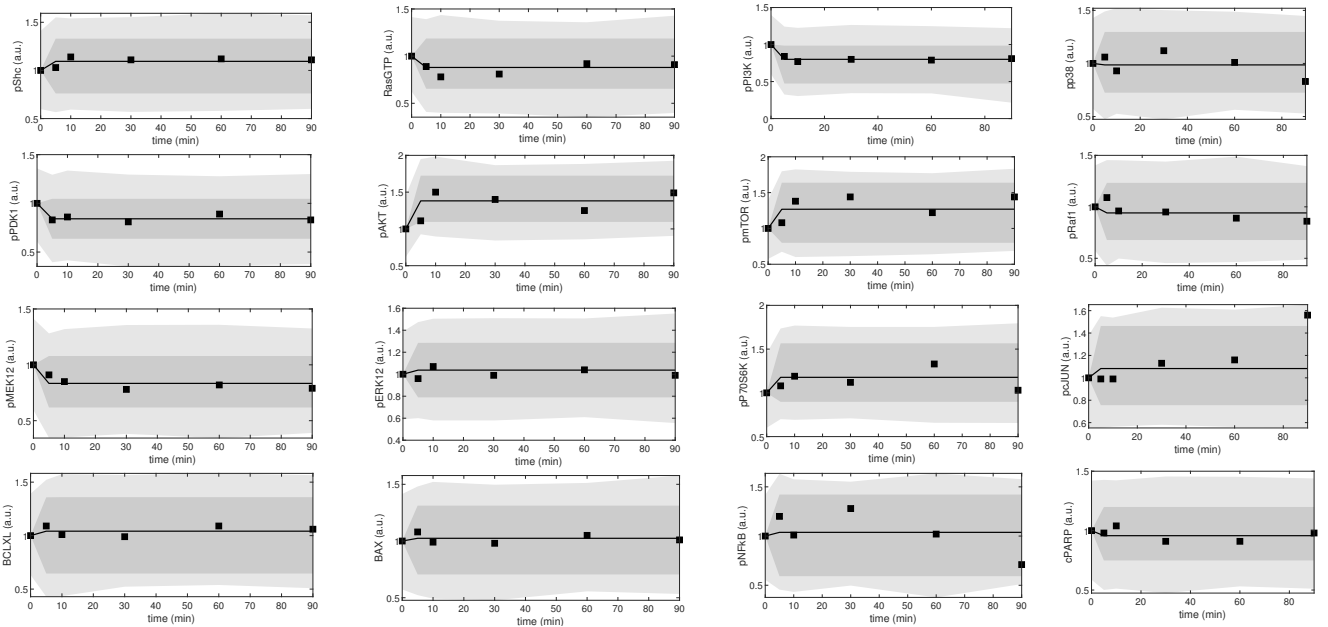

**Figure S80:** Model M3-DRAM: simulated output variables (blue lines) using mean values of the chains returned by DRAM at the 6<sup>th</sup> run, in comparison with RPPA data (red squares). The initial prior is lognormal.

| Parameter name      | Iteration 5 |        |          |
|---------------------|-------------|--------|----------|
|                     | Mean        | Mode   | Variance |
| $k_{GFR}$           | 0.6079      | 0.5338 | 0.0078   |
| $k_{pGFR}$          | 0.4396      | 0.3878 | 0.0041   |
| $k_{Shc.pGFR}$      | 0.7391      | 0.7046 | 0.0116   |
| $k_{pShc}$          | 0.6926      | 0.6553 | 0.0101   |
| $k_{RasGDP.pShc}$   | 0.5937      | 0.5611 | 0.0075   |
| $k_{RasGTP.pERK12}$ | 0.8554      | 0.8184 | 0.0155   |
| $k_{IRS1.pGFR}$     | 0.5548      | 0.5183 | 0.0065   |
| $k_{pIRS1.pERK12}$  | 0.4598      | 0.4117 | 0.0045   |
| $k_{pIRS1.pAKT}$    | 0.4804      | 0.4175 | 0.0049   |
| $k_{PI3K.pIRS1}$    | 0.6125      | 0.5789 | 0.0080   |
| $k_{pPI3K}$         | 0.6547      | 0.6168 | 0.0090   |
| $k_{MKK47.RasGTP}$  | 0.5319      | 0.4712 | 0.0059   |
| $k_{MKK47.pPI3K}$   | 0.4981      | 0.4465 | 0.0052   |
| $k_{pMKK47}$        | 0.4745      | 0.4130 | 0.0048   |
| $k_{p38.pMKK47}$    | 0.6369      | 0.6076 | 0.0084   |
| $k_{pp38}$          | 0.8368      | 0.7680 | 0.0153   |
| $k_{PDK1.pPI3K}$    | 0.6678      | 0.6402 | 0.0094   |
| $k_{pPDK1}$         | 0.7426      | 0.7091 | 0.0118   |
| $k_{AKT.pPDK1}$     | 0.5910      | 0.5917 | 0.0072   |
| $k_{AKT.pPI3K}$     | 0.5799      | 0.6109 | 0.0068   |
| $k_{AKT.RasGTP}$    | 0.5472      | 0.5571 | 0.0061   |
| $k_{pAKT}$          | 0.7398      | 0.6738 | 0.0134   |
| $k_{mTOR.pAKT}$     | 0.9066      | 0.8733 | 0.0172   |
| $k_{pmTOR}$         | 0.6078      | 0.5711 | 0.0079   |
| $k_{Raf1.RasGTP}$   | 0.5639      | 0.5187 | 0.0066   |
| $k_{Raf1.pPI3K}$    | 0.5786      | 0.5208 | 0.0070   |
| $k_{pRaf1.pAKT}$    | 0.8410      | 0.7850 | 0.0159   |
| $k_{MEK12.pRaf1}$   | 0.6502      | 0.6176 | 0.0090   |
| $k_{pMEK12}$        | 0.8563      | 0.8108 | 0.0155   |
| $k_{ERK12.MEK12}$   | 0.5497      | 0.5087 | 0.0063   |
| $k_{ERK12.pp38}$    | 0.5700      | 0.5233 | 0.0067   |
| $k_{pERK12}$        | 1.0114      | 0.9727 | 0.0231   |
| $k_{P70S6K.pERK12}$ | 0.5459      | 0.4793 | 0.0063   |
| $k_{P70S6K.pmTOR}$  | 0.5926      | 0.5326 | 0.0075   |
| $k_{pP70S6K}$       | 1.0291      | 0.9889 | 0.0222   |
| $k_{JNK.pMKK47}$    | 0.6475      | 0.5921 | 0.0087   |
| $k_{pJNK}$          | 0.4638      | 0.4119 | 0.0046   |
| $k_{cJUN.pJNK}$     | 0.7145      | 0.6780 | 0.0108   |
| $k_{pcJUN}$         | 0.7696      | 0.7356 | 0.0125   |
| $k_{BCLXL.pp38}$    | 0.8670      | 0.8766 | 0.0154   |
| $k_{BCLXL.pJNK}$    | 0.6746      | 0.6111 | 0.0100   |
| $k_{BAX.pp38}$      | 0.4538      | 0.4444 | 0.0042   |
| $k_{BAX.pJNK}$      | 0.5222      | 0.5237 | 0.0056   |
| $k_{BAX}$           | 1.3260      | 1.1884 | 0.0403   |
| $k_{IKK.pMKK47}$    | 0.5089      | 0.4454 | 0.0055   |
| $k_{IKK.pAKT}$      | 0.4758      | 0.4120 | 0.0048   |
| $k_{pIKK}$          | 0.4743      | 0.4147 | 0.0047   |
| $k_{NFkB.pIKK}$     | 0.6637      | 0.6208 | 0.0097   |
| $k_{pNFkB}$         | 0.9004      | 0.9110 | 0.0165   |
| $k_{PARP.pcJUN}$    | 0.6005      | 0.5482 | 0.0076   |
| $k_{PARP.BAX}$      | 0.5032      | 0.4498 | 0.0053   |
| $k_{cPARP.BCLXL}$   | 0.5514      | 0.4968 | 0.0064   |
| $k_{cPARP.pNFkB}$   | 0.6494      | 0.5725 | 0.0089   |

Table S24. Model M3-CRC: summary statistics of parameter pdfs in iteration 5 of CRC algorithm.

| Protein name | Iteration 5 |                  |
|--------------|-------------|------------------|
|              | Mean        | Variance         |
| pShc         | 0.0729      | 0.0019           |
| RasGTP       | 0.1065      | 0.0036           |
| pPI3K        | 0.0982      | 0.0044           |
| pp38         | 0.1026      | $9.82 * 10^{-4}$ |
| pPDK1        | 0.1001      | 0.0042           |
| pAKT         | 0.0978      | $2.31 * 10^{-4}$ |
| pmTOR        | 0.0937      | $1.89 * 10^{-4}$ |
| pRaf1        | 0.0896      | 0.0014           |
| pMEK12       | 0.0997      | 0.0033           |
| pERK12       | 0.0726      | 0.0019           |
| pP70S6K      | 0.0809      | $6.25 * 10^{-4}$ |
| pcJUN        | 0.1190      | $8.46 * 10^{-4}$ |
| BCLXL        | 0.1688      | 0.0121           |
| BAX          | 0.1583      | 0.0094           |
| pNFkB        | 0.1638      | $4.74 * 10^{-4}$ |
| cPARP        | 0.0853      | 0.0025           |

**Table S25.** Model M3-CRC: summary statistics of distance functions pdfs in iteration 5 of CRC algorithm.

| Parameter name      | Iteration 6 |        |          |
|---------------------|-------------|--------|----------|
|                     | Mean        | Mode   | Variance |
| $k_{GFR}$           | 0.5971      | 0.5625 | 0.0023   |
| $k_{pGFR}$          | 0.4348      | 0.4127 | 0.0012   |
| $k_{Shc.pGFR}$      | 0.7868      | 0.7663 | 0.0040   |
| $k_{pShc}$          | 0.7355      | 0.7292 | 0.0034   |
| $k_{RasGDP.pShc}$   | 0.6289      | 0.6197 | 0.0025   |
| $k_{RasGTP.pERK12}$ | 0.9150      | 0.8897 | 0.0054   |
| $k_{IRS1.pGFR}$     | 0.5785      | 0.5476 | 0.0022   |
| $k_{pIRS1.pERK12}$  | 0.4621      | 0.4334 | 0.0014   |
| $k_{pIRS1.pAKT}$    | 0.4689      | 0.4495 | 0.0014   |
| $k_{PI3K.pIRS1}$    | 0.6418      | 0.6195 | 0.0027   |
| $k_{pPI3K}$         | 0.6984      | 0.7116 | 0.0030   |
| $k_{MKK47.RasGTP}$  | 0.5272      | 0.4906 | 0.0018   |
| $k_{MKK47.pPI3K}$   | 0.4993      | 0.4671 | 0.0016   |
| $k_{pMKK47}$        | 0.4638      | 0.4526 | 0.0014   |
| $k_{p38.pMKK47}$    | 0.6686      | 0.6382 | 0.0030   |
| $k_{pp38}$          | 0.8753      | 0.8986 | 0.0047   |
| $k_{PDK1.pPI3K}$    | 0.7155      | 0.7076 | 0.0033   |
| $k_{pPDK1}$         | 0.7963      | 0.7976 | 0.0040   |
| $k_{AKT.pPDK1}$     | 0.6653      | 0.6471 | 0.0028   |
| $k_{AKT.pPI3K}$     | 0.6866      | 0.6833 | 0.0030   |
| $k_{AKT.RasGTP}$    | 0.6258      | 0.6030 | 0.0025   |
| $k_{pAKT}$          | 0.7443      | 0.7289 | 0.0036   |
| $k_{mTOR.pAKT}$     | 0.9853      | 0.9623 | 0.0061   |
| $k_{pmTOR}$         | 0.6340      | 0.6089 | 0.0026   |
| $k_{Raf1.RasGTP}$   | 0.5884      | 0.6227 | 0.0022   |
| $k_{Raf1.pPI3K}$    | 0.5901      | 0.6132 | 0.0022   |
| $k_{pRaf1.pAKT}$    | 0.8548      | 0.8112 | 0.0049   |
| $k_{MEK12.pRaf1}$   | 0.6934      | 0.6799 | 0.0031   |
| $k_{pMEK12}$        | 0.9060      | 0.8875 | 0.0053   |
| $k_{ERK12.MEK12}$   | 0.5742      | 0.5843 | 0.0021   |
| $k_{ERK12.pp38}$    | 0.5911      | 0.5982 | 0.0022   |
| $k_{pERK12}$        | 1.0606      | 1.0261 | 0.0076   |
| $k_{P70S6K.pERK12}$ | 0.5402      | 0.5474 | 0.0018   |
| $k_{P70S6K.pmTOR}$  | 0.6025      | 0.6221 | 0.0023   |
| $k_{pP70S6K}$       | 1.0856      | 1.0499 | 0.0078   |
| $k_{JNK.pMKK47}$    | 0.6645      | 0.6491 | 0.0028   |
| $k_{pJNK}$          | 0.4604      | 0.4391 | 0.0014   |
| $k_{cJUN.pJNK}$     | 0.7680      | 0.7849 | 0.0037   |
| $k_{pcJUN}$         | 0.8138      | 0.7797 | 0.0043   |
| $k_{BCLXL.pp38}$    | 0.9683      | 0.9244 | 0.0061   |
| $k_{BCLXL.pJNK}$    | 0.6929      | 0.6924 | 0.0030   |
| $k_{BAX.pp38}$      | 0.4949      | 0.4607 | 0.0016   |
| $k_{BAX.pJNK}$      | 0.5805      | 0.5428 | 0.0022   |
| $k_{BAX}$           | 1.3567      | 1.3858 | 0.0113   |
| $k_{IKK.pMKK47}$    | 0.5001      | 0.4766 | 0.0016   |
| $k_{IKK.pAKT}$      | 0.4620      | 0.4377 | 0.0014   |
| $k_{pIKK}$          | 0.4638      | 0.4357 | 0.0014   |
| $k_{NFkB.pIKK}$     | 0.7048      | 0.7049 | 0.0031   |
| $k_{pNFkB}$         | 1.0055      | 0.9598 | 0.0066   |
| $k_{PARP.pcJUN}$    | 0.6107      | 0.5709 | 0.0024   |
| $k_{PARP.BAX}$      | 0.5013      | 0.4730 | 0.0016   |
| $k_{cPARP.BCLXL}$   | 0.5596      | 0.5497 | 0.0020   |
| $k_{cPARP.pNFkB}$   | 0.6454      | 0.6628 | 0.0026   |

Table S26. Model M3-CRC: summary statistics of parameter pdfs in iteration 6 of CRC algorithm.

| Protein name | Iteration 6 |                         |
|--------------|-------------|-------------------------|
|              | Mean        | Variance                |
| pShc         | 0.0447      | $4.6508 \times 10^{-4}$ |
| RasGTP       | 0.0686      | $6.6274 \times 10^{-4}$ |
| pPI3K        | 0.0598      | 0.0014                  |
| pp38         | 0.0861      | $1.7727 \times 10^{-4}$ |
| pPDK1        | 0.0595      | 0.0012                  |
| pAKT         | 0.0877      | $6.88 \times 10^{-6}$   |
| pmTOR        | 0.0862      | $1.81 \times 10^{-5}$   |
| pRaf1        | 0.0706      | $4.57 \times 10^{-4}$   |
| pMEK12       | 0.0631      | $7.32 \times 10^{-4}$   |
| pERK12       | 0.0459      | $4.44 \times 10^{-4}$   |
| pP70S6K      | 0.0680      | $1.68 \times 10^{-4}$   |
| pcJUN        | 0.1023      | $6.77 \times 10^{-5}$   |
| BCLXL        | 0.1132      | 0.0064                  |
| BAX          | 0.0919      | 0.0040                  |
| pNFkB        | 0.1508      | $1.43 \times 10^{-4}$   |
| cPARP        | 0.0567      | $5.68 \times 10^{-4}$   |

**Table S27.** Model M3-CRC: summary statistics of distance function pdfs in iteration 6 of CRC algorithm.

| Protein name | MSE                  |
|--------------|----------------------|
| pShc         | $6.85 \cdot 10^{-4}$ |
| RasGTP       | 0.0015               |
| pPI3K        | $2.50 \cdot 10^{-4}$ |
| pp38         | 0.83                 |
| pPDK1        | 0.0012               |
| pAKT         | 0.0157               |
| pmTOR        | 0.0093               |
| pRaf1        | $8.64 \cdot 10^{-4}$ |
| pMEK12       | $2.07 \cdot 10^{-4}$ |
| pERK12       | 0.0046               |
| pP70S6K      | 0.0084               |
| pcJUN        | 0.005                |
| BCLXL        | $6.84 \cdot 10^{-4}$ |
| BAX          | $7.62 \cdot 10^{-4}$ |
| pNFkB        | 0.0639               |
| cPARP        | $1.05 \cdot 10^{-6}$ |

**Table S28.** Model M3-PL: MSE of each output variable when using best fit parameters estimated by *lsqnonlin* in D2D software.



| Parameter name       | $\hat{p}$             | $\sigma^-$            | $\sigma^+$            |
|----------------------|-----------------------|-----------------------|-----------------------|
| $k_{AKT\_RasGTP}$    | $7.59 \cdot 10^{-04}$ | $7.30 \cdot 10^{-04}$ | $8.12 \cdot 10^{-04}$ |
| $k_{AKT\_pPDK1}$     | $1.56 \cdot 10^{-04}$ | $1.69 \cdot 10^{-04}$ | $2.72 \cdot 10^{-04}$ |
| $k_{AKT\_pPI3K}$     | 0.0781                | 0.0781                | 0.0781                |
| $k_{BAX}$            | $5.45 \cdot 10^{-04}$ | $5.46 \cdot 10^{-04}$ | $6.41 \cdot 10^{-04}$ |
| $k_{BAX\_pJNK}$      | $1.77 \cdot 10^{-04}$ | $1.79 \cdot 10^{-04}$ | $2.55 \cdot 10^{-04}$ |
| $k_{BAX\_pp38}$      | 0.7519                | 0.7324                | 0.7589                |
| $k_{BCLXL\_pJNK}$    | $1.5 \cdot 10^{-3}$   | $9 \cdot 10^{-3}$     | $9.1 \cdot 10^{-3}$   |
| $k_{BCLXL\_pp38}$    | 1.3002                | 0.5888                | 1.4624                |
| $k_{ERK12\_MEK12}$   | $2.98 \cdot 10^{-3}$  | $2.9 \cdot 10^{-3}$   | $3 \cdot 10^{-3}$     |
| $k_{ERK12\_pp38}$    | 0.8292                | 0.8325                | 0.8504                |
| $k_{GFR}$            | $7.03 \cdot 10^{-04}$ | $6.96 \cdot 10^{-04}$ | $7.06 \cdot 10^{-04}$ |
| $k_{IKK\_pAKT}$      | 0.0903                | 0.0903                | 0.0903                |
| $k_{IKK\_pMKK47}$    | 0.0311                | 0.0311                | 0.0311                |
| $k_{IRS1\_pGFR}$     | 0.1228                | 0.1228                | 0.1228                |
| $k_{JNK\_pMKK47}$    | 0.03                  | 0.03                  | 0.03                  |
| $k_{MEK12\_pRaf1}$   | 0.195                 | 0.2470                | 0.2966                |
| $k_{MKK47\_RasGTP}$  | 1.5523                | 1.5521                | 1.5526                |
| $k_{MKK47\_pPI3K}$   | 1.6429                | 1.6427                | 1.6431                |
| $k_{NFkB\_pIKK}$     | 30.6549               | 30.6548               | 30.6567               |
| $k_{P70S6K\_pERK12}$ | 0.0688                | 0                     | 0.1192                |
| $k_{P70S6K\_pmTOR}$  | 0.3765                | 0.3128                | 0.4554                |
| $k_{PARP\_BAX}$      | 19.8215               | 19.8201               | 19.8216               |
| $k_{PARP\_pcJUN}$    | 62.2501               | 62.2496               | 62.2503               |
| $k_{PDK1\_pPI3K}$    | 1.1727                | 1.3660                | 2.3007                |
| $k_{PI3K\_pIRS1}$    | 0.9584                | 0.9584                | 0.9589                |
| $k_{Raf1\_RasGTP}$   | $4.95 \cdot 10^{-03}$ | 0.0998                | 0.1011                |
| $k_{Raf1\_pPI3K}$    | 0.282                 | 0.267                 | 0.3647                |
| $k_{RasGDP\_pShc}$   | 0.0973                | 0.0973                | 0.0973                |
| $k_{RasGTP\_pERK12}$ | 0.1447                | 0.1447                | 0.1447                |
| $k_{Shc\_pGFR}$      | 0.0941                | 0.0941                | 0.0942                |
| $k_{cJUN\_pJNK}$     | 0.0122                | 0.0122                | 0.0122                |
| $k_{cPARP\_BCLXL}$   | $1.61 \cdot 10^{-05}$ | 0.0049                | $+\infty$             |
| $k_{cPARP\_pNFkB}$   | 98.6713               | 92.1351               | 100.8602              |
| $k_{mTOR\_pAKT}$     | 0.1198                | 0.0997                | 0.1459                |
| $k_{p38\_pMKK47}$    | 0.0164                | 0.0164                | 0.0165                |
| $k_{pP70S6K}$        | 0.412                 | 0.3478                | 0.4862                |
| $k_{pAKT}$           | 0.0244                | 0.0244                | 0.0244                |
| $k_{pERK12}$         | $4.81 \cdot 10^{-03}$ | $6.2 \cdot 10^{-03}$  | $6.9 \cdot 10^{-03}$  |
| $k_{pGFR}$           | $7.81 \cdot 10^{-05}$ | $4.54 \cdot 10^{-05}$ | $9.93 \cdot 10^{-05}$ |
| $k_{pIKK}$           | 0.5302                | 0.5302                | 0.5302                |
| $k_{pIRS1\_pAKT}$    | $2.52 \cdot 10^{-05}$ | 0                     | $+\infty$             |
| $k_{pIRS1\_pERK12}$  | 0.7824                | 0.7824                | 0.7824                |
| $k_{pJNK}$           | $1.00 \cdot 10^{-05}$ | $4.23 \cdot 10^{-05}$ | $+\infty$             |
| $k_{pMEK12}$         | 0.2669                | 0.1769                | 0.2109                |
| $k_{pMKK47}$         | 0.0322                | 0.0321                | 0.0322                |
| $k_{pNFkB}$          | 10.4550               | 10.4547               | 10.4551               |
| $k_{pPDK1}$          | 1.2962                | 0.5833                | 1.2624                |
| $k_{pPI3K}$          | 0.4037                | 0.4036                | 0.4037                |
| $k_{pRaf1\_pAKT}$    | 0.1959                | 0.195                 | 0.1624                |
| $k_{pShc}$           | 0.0761                | 0.076                 | 0.0761                |
| $k_{pcJUN}$          | $2.58 \cdot 10^{-3}$  | $2.58 \cdot 10^{-3}$  | $2.6 \cdot 10^{-3}$   |
| $k_{pmTOR}$          | 0.0776                | 0.0622                | 0.0945                |
| $k_{pp38}$           | 15.4404               | 15.3488               | 15.5264               |

**Table S29.** Model M3-PL: results of parameter estimation and Profile Likelihood for model M3.  $\hat{p}$  indicates the estimated optimal parameter value.  $\sigma^-$  and  $\sigma^+$  indicate the 95% point-wise confidence intervals. Structural non-identifiable parameters are highlighted in blue while practical non-identifiable parameters highlighted in red.

| Iteration | Tolerance |
|-----------|-----------|
| 1         | 10.5      |
| 2         | 6.4       |
| 3         | 4.4       |
| 4         | 2.9       |
| 5         | 1.875     |
| 6         | 1.496     |

**Table S30.** Model M3-ABC SMC: threshold schedule of ABC-SMC. The threshold in each iteration is equal to the sum of all thresholds fixed in CRC in the same corresponding iteration.

| Iteration | Number of particles | Acceptance rate | Time to complete (s) |
|-----------|---------------------|-----------------|----------------------|
| 1         | 1460                | 0.6849          | 1362                 |
| 2         | 1549                | 0.6455          | 1333                 |
| 3         | 3734                | 0.2678          | 3064                 |
| 4         | 85993               | 0.0116          | 70710                |

**Table S31.** Model M3-ABC SMC: results of ABC-SMC algorithm until the 4 – *th* iteration: number of particles generated, acceptance rate and time employed for each iteration using the ABC-SysBio software Liepe et al. (2014).

| Protein name | MSE    |
|--------------|--------|
| pShc         | 0.0798 |
| RasGTP       | 0.0115 |
| pPI3K        | 0.0278 |
| pp38         | 0.0159 |
| pPDK1        | 0.0112 |
| pAKT         | 0.0195 |
| pmTOR        | 0.0562 |
| pRaf1        | 0.0118 |
| pMEK12       | 0.0169 |
| pERK12       | 0.1157 |
| pP70S6K      | 0.0971 |
| pcJUN        | 0.0356 |
| BCLXL        | 0.0091 |
| BAX          | 1.1693 |
| pNFkB        | 0.0415 |
| cPARP        | 0.0452 |

**Table S32.** Model M3-ABC SMC: MSE of each output variable using the median parameter vector returned by the standard ABC-SMC in the 4 – *th* iteration.

## REFERENCES

- Toni T, Welch D, Strelkowa N, Ipsen A, Stumpf MPH. Approximate Bayesian computation scheme for parameter inference and model selection in dynamical systems. *Journal of the Royal Society, Interface* **6** (2009) 187–202. doi:10.1098/RSIF.2008.0172.
- Raue A, Kreutz C, Maiwald T, Klingmüller U, Timmer J. Addressing parameter identifiability by model-based experimentation. *IET systems biology* **5** (2011) 120–130.
- Peng H, Peng T, Wen J, Engler DA, Matsunami RK, Su J, et al. Characterization of p38 MAPK isoforms for drug resistance study using systems biology approach. *Bioinformatics* **30** (2014) 1899–1907. doi:10.1093/bioinformatics/btu133.
- Liepe J, Kirk P, Filippi S, Toni T, Barnes CP, Stumpf MPH. A framework for parameter estimation and model selection from experimental data in systems biology using approximate Bayesian computation. *Nature Protocols* **9** (2014) 439–456. doi:10.1038/nprot.2014.025.
